# Supplementary material for: Variability of polycyclic aromatic hydrocarbons and their oxidative derivatives in wintertime Beijing, China
Source: Copernicus journal article supplement (doi:10.5194/acp-2019-120), 2019-03-05
Supplement: Supplementary file [file acp-2019-120-SC1-supplement.pdf]

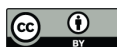

# 1 Variability of polycyclic aromatic hydrocarbons and their 2 oxidative derivatives in wintertime Beijing, China.

3 Atallah. El zein<sup>1</sup>, Rachel Ellen. Dunmore<sup>1</sup>, Martyn William. Ward<sup>1</sup>, Jacqueline Fiona.  
4 Hamilton<sup>1</sup>, Alastair Charles. Lewis<sup>2</sup>

5  
6 <sup>1</sup>Wolfson Atmospheric Chemistry Laboratories, Department of chemistry, University of York, York, YO10 5DD,  
7 United Kingdom

8 <sup>2</sup>National Centre for Atmospheric Science, University of York, York, YO10 5DD, United Kingdom

9 Correspondence to: Atallah. El zein ([atallah.elzein@york.ac.uk](mailto:atallah.elzein@york.ac.uk)); Alastair C. Lewis ([ally.lewis@york.ac.uk](mailto:ally.lewis@york.ac.uk))

10 **Abstract.** Ambient particulate matter (PM) can contain a mix of different toxic species derived from a wide  
11 variety of sources. This study quantifies the variation in diurnal and nocturnal abundance of 16 Polycyclic  
12 Aromatic Hydrocarbons (PAHs), 10 Oxygenated PAHs (OPAHs) and 9 Nitrated PAHs (NPAHs) in ambient PM  
13 in central Beijing during winter. Target compounds were identified and quantified using Gas Chromatography –  
14 time of flight mass spectrometry (GC-Q-TOF-MS). The total concentration of PAHs varied between 18 and 297  
15 ng m<sup>-3</sup> over 3 h daytime filter samples and from 23 to 165 ng m<sup>-3</sup> in 15 h night-time samples. The total  
16 concentrations of PAHs over 24h varied between 37 and 180 ng m<sup>-3</sup> (mean: 97 ng m<sup>-3</sup>). The total daytime  
17 concentrations during high particulate loading conditions for PAHs, OPAHs and NPAHs were 224, 54, and 2.3  
18 ng m<sup>-3</sup>, respectively. The most abundant PAHs were fluoranthene (33 ng m<sup>-3</sup>), chrysene (27 ng m<sup>-3</sup>), pyrene (27  
19 ng m<sup>-3</sup>), benzo(a)pyrene (27 ng m<sup>-3</sup>), benzo[b]fluoranthene (25 ng m<sup>-3</sup>), benzo[a]anthracene (20 ng m<sup>-3</sup>) and  
20 phenanthrene (18 ng m<sup>-3</sup>). 9,10-Anthraquinone (18 ng m<sup>-3</sup>), 1,8 Naphthalic anhydride (14 ng m<sup>-3</sup>) and 9-  
21 Fluorenone (12 ng m<sup>-3</sup>) were the three major OPAHs species, while 9-Nitroanthracene (0.84 ng m<sup>-3</sup>), 3-  
22 Nitrofluoranthene (0.78 ng m<sup>-3</sup>) and 3-Nitrodibenzofuran (0.45 ng m<sup>-3</sup>) were the three most abundant NPAHs.  
23 ΣPAHs and ΣOPAHs showed a strong positive correlation with the gas phase abundance of NO, CO, SO<sub>2</sub>, and  
24 HONO indicating that PAHs and OPAHs can be associated with both local and regional emissions. Diagnostic  
25 ratios suggested emissions from traffic road and coal combustion were the predominant sources for PAHs in  
26 Beijing, and also revealed the dominant source of NPAHs was secondary photochemical formation rather than  
27 primary emissions. PM<sub>2.5</sub> and NPAHs showed a strong correlation with gas phase HONO. 9-Nitroanthracene  
28 appeared to undergo a photodegradation during the daytime and has shown a strong positive correlation with  
29 ambient HONO (R=0.90, P<0.001). The lifetime excess lung cancer risk for the species with available  
30 toxicological data (16 PAHs, 1 OPAH and 6 NPAHs) was calculated to be in the range 10<sup>-5</sup> to 10<sup>-3</sup> (risk per million  
31 people range from 26 to 2053).

## 32 1 Introduction

33 Outdoor air pollution contains a complex set of toxicological hazards and has become the largest detrimental  
34 environmental effect on human health (WHO/IARC., 2016). Exposure to outdoor high particulate loading of PM<sub>2.5</sub>  
35 (aerodynamic diameter less than 2.5 μm) is linked to harmful health effects, particularly affecting urban  
36 populations (Raaschou et al., 2013; Hamra et al., 2014). The major sources of PM<sub>2.5</sub> in urban areas are incomplete



combustion or gas-to-particle conversion, and they contain a varied mix of contaminants including inorganic ions, organic carbon and elemental carbon (Bond et al., 2004; Saikawa et al., 2009). Polycyclic Aromatic Hydrocarbons (PAHs) and their oxidative derivatives (Nitrated PAHs and Oxygenated PAHs) are one class of species with high toxic potency (Zhang et al., 2009; Jia et al., 2011; Wang et al., 2011a). PAHs released in the atmosphere come from both natural and anthropogenic sources; anthropogenic emissions include incomplete combustion of fossil fuels, biomass burning, industrial and agricultural activities and are considered predominant (Zhang et al., 2009; Poulain et al., 2011; Kim et al., 2013; Abbas et al., 2018); natural contributions such as volcanic eruptions and forest fires are reported to be a less significant contributor to total emissions (Xu et al., 2006; Abbas et al., 2018).

Vapour phase PAHs can undergo gas phase reaction with oxidants in the atmosphere (e.g. OH radical, ozone and nitrate radicals) leading to the generation of a range of airborne nitrated-PAHs and oxygenated-PAHs (Atkinson et al., 1990; Atkinson and Arey., 1994; Sasaki, 1997). Atmospheric reaction with chlorine atoms in the presence of oxygen has been suggested as a new formation pathway of OPAHs (Riva et al., 2015). Furthermore, OPAHs and NPAHs are often more toxic than the parent PAHs, showing a direct-acting mutagenicity on human cells (Durant et al., 1996; Hannigan et al., 1998; Purohit and Basu, 2000; Wang et al., 2011a; Benbrahim et al., 2012). Beside their formation in the gas phase, OPAHs and NPAHs can also be produced by heterogeneous reactions (Jariyasopit et al., 2014; Zimmermann et al., 2013; Wenyan et al., 2014; Keyte et al., 2013). Many of these derivatives can also be linked to primary emissions from motor vehicles and combustion processes (Albinet et al., 2007; Shen et al., 2012; Jakober et al., 2007).

In recent years, many studies in different countries have focused on studying toxic organic pollutants in PM<sub>2.5</sub> because they lie within the respirable size range for humans (Sharma et al., 2007; Ringuet et al., 2012; Farren et al., 2015). In the last decade, a major focus has been given to Chinese cities because of their population growth and geographic peripheral expansion in manufacturing and energy industries. This has made China the leader in energy consumption, but also the world's highest emitter of PM<sub>2.5</sub> and PAHs (Lin et al., 2018; Zhang et al., 2009; Xu et al., 2006). The majority of previous studies have reported PAH on 24h PM<sub>2.5</sub> sampling during short-term and long-term measurements campaigns (Alves et al., 2017; Niu et al., 2017; Benjamin et al., 2014; Wang et al., 2011a). However, a long sampling and averaging period creates some limitations (Tsapakis and Stephanou., 2007), notably where changing atmospheric photolysis conditions (air humidity, temperature, wind direction, ozone or other oxidant concentrations) may have a significant influence on PAHs concentrations and oxidation rates (Tsapakis and Stephanou., 2003; Ringuet et al., 2012). More intensive and higher frequency measurements in field campaigns have been suggested as a means to improve the positive matrix factorization model performance (Tian et al., 2017). A few studies have carried out twice daily (12 h) sampling (Zhang et al., 2018; Farren et al., 2015; Ringuet et al., 2012) obtaining limited information on variability in concentrations during the daytime and night-time (Tsapakis and Stephanou., 2007). Considering the above, this paper determines the temporal diurnal and nocturnal variation of the PM<sub>2.5</sub>-bound concentrations of PAHs, OPAHs and NPAHs from the air of Beijing in China, it shows the role of photochemistry in the formation of OPAHs and NPAHs and associate the fate and evolution of PAHs, OPAHs and NPAHs with the gas phase concentrations of other pollutants (O<sub>3</sub>, CO, NO, NO<sub>2</sub>, SO<sub>2</sub>, HONO), the cancer risk associated with inhalation of PM<sub>2.5</sub> was calculated.



## 74 2 Experimental Steps

### 75 2.1 Sampling site and method

76 The sampling campaign shown in Fig. S1 was located at the Institute of Atmospheric Physics, Chinese Academy  
77 of Sciences in Beijing (39°58'28"N 116°22'15"E) as part of the Air Pollution and Human Health (APHH) research  
78 programme. PM<sub>2.5</sub> filter samples were collected on the roof of a 2-storey building about 8m above ground level  
79 using a High-Volume Air Sampler (Ecotech HiVol 3000, Victoria, Australia) operating at 1.33 m<sup>3</sup> min<sup>-1</sup>. Daytime  
80 particles were collected every three-hours during high PM concentration levels, nine-hours at low PM levels and  
81 over 15 h at night-time during 18 continuous days (22 November 2016 to 9 December 2016). Fifty-seven samples  
82 in total were collected. The daytime sampling started at 8:30 in the morning and the filter was changed every 3 h.  
83 The night-time period starts at approximately 17:30 until 08:30 the next day. Prior to sampling, the quartz filters  
84 (20.3 × 25.4 cm) (supplied by Whatman (Maidstone, U.K.)) were baked at 550 °C for 5 h in order to eliminate  
85 any organic matter. After sampling, filters were wrapped in aluminium foil, sealed in polyethylene bags and stored  
86 at -20 °C until extraction and analysis.

87

### 88 2.2 Extraction method and clean up

89 All collected samples were extracted using an Accelerated Solvent Extractor automated system (Dionex, ASE  
90 350). Prior to extraction, 1/16<sup>th</sup> (surface area equivalent to 25.7 cm<sup>2</sup>) of each filter was cut using a hole puncher  
91 (Ø=27 mm) and for each batch of 6 samples, one sample was spiked with a mixture of two deuterated-PAHs  
92 (Phenanthrene-D10; Pyrene-D10), two deuterated-OPAHs (9-Fluorenone-D8; 9,10-Anthraquinone-D8), and two  
93 deuterated-NPAHs (1-Nitronaphthalene-D7; 3-Nitrofluoranthene-D9), as surrogate standards for PAHs, OPAHs  
94 and NPAHs, respectively, with concentration on filters corresponding to 400 ng (40 µl, 10 ng µl<sup>-1</sup> in Acetonitrile).  
95 All punched samples were cut to small pieces and packed into 5 mL stainless steel extraction cell. Extractions  
96 were carried out in acetonitrile and performed as follows: Oven at 120°C, pressure at 1500 psi, rinse volume 60%  
97 and 60 s purge time for three consecutive 5 min cycles. Extracts (V=20ml) were evaporated to approximately 6  
98 mL under a gentle stream of nitrogen before the clean-up step. All samples and blanks were purified on a SPE  
99 silica normal phase cartridge (1g/6ml; SIGMA ALDRICH) in order to maintain the GC injection inlet liner. After  
100 the clean-up step, the solution of each sample was evaporated to 1 mL under a gentle stream of nitrogen at room  
101 temperature (20°C) and transferred to 1.5 ml autosampler amber vial. Each concentrated sample was stored at 4°C  
102 until analysis by GC-Q-ToF-MS. The average recovery efficiencies ranged from 85% to 96%, and the target  
103 compounds concentrations were calculated incorporating measured recovery efficiencies.

### 104 2.3 Chemical standards

105 The chemical compounds that have attracted the most attention in previous studies are the 16 priority PAHs and  
106 their derivatives, defined by the United States Environment Protection Agency (EPA). The choice of the organic  
107 compounds investigated in this study is based on those associated with the particle phase and commercially  
108 available standards. All compounds are listed in Table 1 and were purchased from Sigma Aldrich, Alfa Aesar and  
109 Santa Cruz Biotechnology in the UK and had a minimum purity of 98%. In parallel to individual standards, a



110 mixed solution of the 16 EPA PAHs (CRM47940, Supelco, Sigma Aldrich) of  $10 \mu\text{g ml}^{-1}$  in acetonitrile was also  
111 used. Standard solutions for calibrations were prepared in acetonitrile (HPLC grade, 99.9% purity, Sigma  
112 Aldrich). Deuterated compounds were supplied by C/D/N isotopes and distributed by QMX Laboratories Ltd  
113 (Essex, UK).

#### 114 2.4 GC/MS Analysis

115 Target compounds were quantified using a GC - accurate mass Quadrupole Time-of-Flight GC/MS system (GC  
116 Agilent 7890B coupled to an Agilent 7200 Q-TOF-MS). Parent PAHs were separated in a 35 min analysis time  
117 using a capillary HP-5MS Ultra Inert GC column (Agilent; 5%-Phenyl substituted methylpolysiloxane; length:  
118 30 m, diameter: 0.25 mm, film thickness: 0.25  $\mu\text{m}$ ). Inlet injections of 1  $\mu\text{l}$  were performed in pulsed splitless  
119 mode at 320 °C using an automated liquid injection with the GERSTEL MultiPurpose Sampler (MPS). Helium  
120 was used as a carrier gas at 1.4  $\text{ml min}^{-1}$ . The GC oven temperature was programmed to 65 °C for 4 min as a  
121 starting point and then increased to 185 °C at a heating rate of 40 °C  $\text{min}^{-1}$  and held for 0.5 min, followed by a  
122 heating rate of 10 °C  $\text{min}^{-1}$  to 240 °C and then ramped at 5 °C  $\text{min}^{-1}$  until 320 °C and held isothermally for further  
123 6 min to ensure all analytes from the extracted samples eluted from the column. The MS was operated in Electron  
124 Ionisation (EI) mode at 70 eV with an emission current of 35  $\mu\text{A}$ . Calibration solutions were injected 3 times in  
125 the same sequence for samples and covered the range from 1  $\text{pg } \mu\text{l}^{-1}$  to 1000  $\text{pg } \mu\text{l}^{-1}$ .

126 The analysis of OPAHs and NPAHs was conducted using Negative Chemical Ionisation (NCI) performed at 155  
127 eV and 48  $\mu\text{A}$ , with methane ( $\text{CH}_4$ , research grade 5.5, Air Liquide) as reagent gas. Target compounds were eluted  
128 using the Rxi-5ms (Restek GC column) similar phase and characteristics to HP-5ms. Analysis was performed in  
129 29.2 min and the GC settings were selected as follows: 1  $\mu\text{l}$  of each sample was injected in pulsed splitless mode  
130 at 310 °C, Helium flow was set to 1.2  $\text{ml min}^{-1}$ , the initial oven temperature of 70 °C was held for 4 min, followed  
131 by a heating rate of 60 °C  $\text{min}^{-1}$  until 190 °C and then raised to 270 °C at rate of 25 °C  $\text{min}^{-1}$  and ended with 5 °C  
132  $\text{min}^{-1}$  until 320 °C, held for 10 min. A 10 points calibration curve within the concentrations range of 0.5  $\text{pg } \mu\text{l}^{-1}$  to  
133 1000  $\text{pg } \mu\text{l}^{-1}$ , was performed with the correlation coefficients from the linear regression ranging from 0.980 to  
134 0.999.

#### 135 2.5 Data analysis and error evaluation

136 Data acquisition were recorded and processed using the Agilent Qualitative and Quantitative analysis software.  
137 Target compounds were isolated using Extracted-Ion Chromatogram (EIC) and identified by the combination of  
138 retention time and mass spectral match against the calibration standards measured simultaneously with the  
139 samples. In our study, the limit of detection (LOD) was defined as the valid lowest measurable peak response to  
140 peak noise near the elution time of the target peak ( $S/N = 3$ ) in a mix of standards solutions. As the chemical noise  
141 increases during the analysis of real samples the Limit of quantification (LOQ) was defined  $S/N=10$ . These  
142 recommendations are in accordance with previous analytical studies (Nyiri et al., 2016; Ramírez et al., 2015).  
143 LOD values were evaluated from standards solutions and ranged between 1 pg and 20 pg for PAHs, 0.01 pg and  
144 0.2 pg (except 1-naphthaldehyde 0.5 pg) for OPAHs and 0.02 pg to 0.25 pg for NPAHs.

145



We evaluated the precision of the method by calculating the relative standard deviations (%RSD) from replicate analysis as shown in Table 1. For PAHs, the precision of sample replicates ( $n=10$ ) during interday and intraday varied from 1.8% to 8.9% (mean 5.2%) and 1.2% to 8.7% (mean 3.4%), respectively. The %RSD average for deuterium labelled compounds was about 3.6%. For OPAHs and NPAHs, two different concentrations of standards were analysed (50 pg;  $n=6$  and 400 pg;  $n=6$ ); interday precision of 10 OPAHs gives an average %RSD of 6.8% (range: 5.4–8.9%) and intraday precision of 5.6% (3.2–7.8%). Similar to OPAHs, repeatability and reproducibility between days for NPAHs varied from 3.9% to 8.4% (mean 5.5%) and 3.2% to 9.7% (mean 5.2%), respectively. Hence, the estimated random error quantified by the standard deviation of the measurements did not exceed 7% on average. The systematic error may be due to the influence of the sample matrix during the analysis sequence on the quantification step and the calibration offset. It was estimated to be a maximum 10% from the measured recovery of the deuterium species (Garrido-Frenich et al., 2006). Therefore, the overall estimated uncertainty, combining the precision and the systematic errors, is less than 20%.

To determine any sources of contamination during sample preparation and the analytical procedure, the solvent (acetonitrile) and from blank filters were analysed following the same procedure as for the samples (Extraction, SPE, Evaporation). A few target compounds were detected at trace levels but were either below LOD or orders of magnitude lower than in the samples.

## 3 Results and discussion

### 3.1 Temporal variations of PAHs, OPAHs and NPAHs in $PM_{2.5}$

Studies on  $PM_{2.5}$  have rapidly increased over the last few years and various disciplines have contributed to improve understanding about source emissions, chemical composition, and impact on people's behaviour and health. The air quality standards in China are currently  $35 \mu g m^{-3}$  as a yearly average limit for  $PM_{2.5}$  and  $75 \mu g m^{-3}$  as a 24h average limit (WHO 2016; Ministry of Ecology and Environment The People's Republic of China, 2012). During the sampling period of this study (Nov–Dec 2016),  $PM_{2.5}$  was measured every hour and ranged from 3.8 to  $438 \mu g m^{-3}$ , with an average concentration of  $103 \mu g m^{-3}$ . The average 24h concentration was  $108 \mu g m^{-3}$  ranging from 10 to  $283 \mu g m^{-3}$ , exceeding the 24h limit value on 10 of the 18 sampling days.

Fig. 1 shows the measured concentration of PAHs in the 3 h daytime samples ranging from 18 to  $297 ng m^{-3}$  (average  $87.32 ng m^{-3}$ ) and from 23 to  $165 ng m^{-3}$  (average  $107.40 ng m^{-3}$ ) in the 15 h night-time samples. The 24h total concentrations (combined results from daytime and night-time samples) of the 16 PAHs varied between 37 and  $180 ng m^{-3}$  (average  $97 ng m^{-3}$ ). PAHs derivatives showed the following trends: total OPAHs concentrations varied from 3.3 to  $55 ng m^{-3}$  (average:  $26 ng m^{-3}$ ) in total daytime hours and from 8.9 to  $95 ng m^{-3}$  (average:  $41.63 ng m^{-3}$ ) at night-time; OPAHs were approximately 25 and 14 times higher than average NPAHs in the daytime (average:  $1.03 ng m^{-3}$ , range: 0.13–2.3) and night-time (average:  $3.06 ng m^{-3}$ , range: 0.57–6.43), respectively.

PHE (See table 1 for abbreviations), FLT, PYR, BaA, CHR, BbF and BaP were the largest contributors to the total PAHs concentrations, whereas 9-FLON, 9,10-ANQ and 1,8-NANY were the three major O-PAHs species. The most abundant NPAHs were 3-NDBF, 9-NANT and 3-NFLT; contributions of each compound to the total



concentration are shown in Fig. 2 and detailed in Table 2. The highest concentrations recorded in this study were in the day of 29 Nov 2016; concentrations of all target compounds in the particulate phase are displayed in Fig. S2. Some nitro-compounds (5-NAC, 1-NPYR, 6-NCHR, 6-NBaP) were below LOQ in few samples while one oxy-compound (1,8-Naphthalic anhydride) was outside the dynamic range and limit of linearity of the calibration curve especially for samples with high mass loading (Table 2). Similar major compounds were found in different urban cities (Xi'an, Jinan, Beijing) of China (Bandowe et al. 2014, Zhang et al. 2018, Wang et al., 2011c). The average of total PAHs concentrations ( $97 \text{ ng m}^{-3}$ ) in this study was higher than the average value reported for Guangzhou city in the south of China (average  $45.52 \text{ ng m}^{-3}$ ) (Liu et al., 2015), however, it was lower than average values reported for Xi'an city in winter (range  $14\text{--}701 \text{ ng m}^{-3}$ ; average  $206 \text{ ng m}^{-3}$ ) (Wang et al., 2006) and in the suburb of Beijing in winter (average  $277 \text{ ng m}^{-3}$ ) (Feng et al., 2005). The lower average concentration of total PAHs reported in this study can be attributed to the effort from municipal government to improve air quality and control emissions by reducing combustion sources.

Concentrations of PAHs in  $\text{PM}_{10}$  (range:  $3.2\text{--}222.7 \text{ ng m}^{-3}$ ) in Beijing were found in previous study to be lower than in  $\text{PM}_{2.5}$  (Wang et al., 2011c). The concentration of PAHs reported in this study were much lower than reported in certain other megacities, for example, Delhi, India in winter season 2003 (range:  $948.96\text{--}1345.42 \text{ ng m}^{-3}$ ; mean:  $1157.9 \pm 113.74 \text{ ng m}^{-3}$ ) (Sharma et al., 2007) and Mexico City, Mexico in October 2002 (range:  $60\text{--}910 \text{ ng m}^{-3}$ ; mean:  $310 \text{ ng m}^{-3}$ ) (Marr et al., 2004). Average concentration for total PAHs in the first 3 h filter of the day (8:30–11:30 am; Monday to Friday; mean:  $112 \text{ ng m}^{-3}$ ) were higher by 1.5 times than the rest of the day, and 1.6 times higher than the same first 3 h on a Sunday. A potential reason of the elevated concentrations in the morning hours is due to the rush hour traffic during working days, probably coupled to a period of shallow boundary layer.

The mean total concentrations in Table 2 for the 3 h integration samples of OPAHs and NPAHs were  $28.74 \text{ ng m}^{-3}$  (range:  $1.8\text{--}87.9 \text{ ng m}^{-3}$ ) and  $1.17 \text{ ng m}^{-3}$  (range:  $0.15\text{--}3.92 \text{ ng m}^{-3}$ ), respectively. Average night-time was  $41.63 \text{ ng m}^{-3}$  (OPAHs) and  $3.06 \text{ ng m}^{-3}$  (NPAHs), concentrations which were 2.6 and 35 times lower than the average total PAHs in the night samples, respectively. The ratios of mean concentration of PAHs divided by concentration of OPAHs and NPAHs for the 3 h samples were 3.03 and 74, respectively. Ratios of combined daytime and night-time samples (24h) were on average 2.93 (range 1.9 – 4.6) for PAHs/OPAHs and 47.36 (range 25 – 79) for PAHs/NPAHs. Lower ratios were reported from winter study in Xi'an – China, where PAHs/OPAHs ranged from 1.75 to 1.86 and PAHs/NPAHs ranged from 34 to 55.2. On the other hand, similar trends to our study were recorded for  $\Sigma\text{PAHs}/\Sigma\text{OPAHs}$  in Europe such as Athens in Greece in winter (ratio  $28.91/6.91 = 4.18$ ) (Andreou and Rapsomanikis., 2009) and Augsburg in Germany in winter (ratio  $11/3.2 = 3.43$ ) (Pietrogrande et al., 2011). Further monitoring studies are needed to confirm trends of NPAHs in China.

The daily concentration of BaP ranged from  $4.46\text{--}29.8 \text{ ng m}^{-3}$  (average  $15 \text{ ng m}^{-3}$ ), exceeding the 24h average limit value of  $2.5 \text{ ng m}^{-3}$  for China on all of the 18 days of sampling period (Ministry of Ecology and Environment The People's Republic of China, 2012).



### 3.2 Diagnostic ratios to identify emission sources

The concentration ratios between different PAHs are widely used to assess and identify pollution emission sources (Tobiszewski and Namieśnik, 2012 and references therein). The ratios of FLT/(FLT + PYR) and IcdP/(IcdP + BghiP) isomer pairs are commonly used to distinguish emission sources such as coal/biomass burning or the incomplete combustion of petroleum. Values of FLT/(FLT + PYR) and IcdP/(IcdP + BghiP) higher than 0.5 indicate dominance of a coal/biomass burning source. Values of FLT/(FLT + PYR) between 0.4 and 0.5 and IcdP/(IcdP + BghiP) between 0.2 and 0.5 suggest a higher influence from fossil fuel combustion; values less than 0.4 and 0.2, are mostly related to incomplete combustion (petrogenic origin) (Yunker et al., 2002; Pio et al., 2001). The measured ratios in this study are shown in Fig. 3 and ranged from 0.53 to 0.67 (mean 0.56) during the day (3 h and 9 h samples), while at night (15 h samples) varied between 0.51 and 0.54 (mean 0.52) indicating primary emissions from coal and biomass burning. Lower values were observed for IcdP/(IcdP + BghiP) where daytime ratios were between 0.39 and 0.5 (3 h and 9 h samples) indicating the dominance of petroleum combustion. At night, the ratio in most samples was slightly higher than 0.5, with some values below, suggesting mixed sources with likely higher contributions coming from residential heating using coal and wood at night.

Other ratios can be useful to confirm the contribution from local traffic and to discriminate vehicle emissions such as BaP/BghiP, FLU/FLU+PYR and BaP/BaP+CHR (Tobiszewski and Namieśnik, 2012 and references therein). The BaP/BghiP ratios were significantly higher than 0.6 indicating a major influence from road traffic, while FLU/FLU+PYR ratios suggested a predominant petrol contribution (ratio < 0.5) instead of diesel engines (ratio > 0.5). Results shown in Fig. 4 identify **traffic emissions and in particular petrol engines** as the major emitter of PAHs. In PM<sub>2.5</sub>, the 5- and 6-rings PAHs species (BaP, IcdP, BghiP) were previously attributed to petrol engines, while lower molecular weight with 3-rings (ACY, AC, FLU, PHE, ANT) and 4-rings (FLT, PYR, BaA, CHR) were closely related to diesel vehicle emissions (Chiang et al., 2012; Wu et al., 2014 and references therein). Previous studies in Beijing and Guangzhou in China suggested similar contributions from coal and petroleum combustion, focusing on vehicular traffic (petrol and diesel) as potential sources for PAHs (Gao and Ji., 2018; Liu et al., 2015; Wu et al., 2014, Niu et al., 2017).

On the other hand, some NPAHs can be used to track the photochemistry of PAHs with OH and NO<sub>3</sub> radicals, both of which can generate secondary photochemical products of NPAHs and OPAHs from primary PAH emissions (Zhang et al., 2018; Ringuet et al., 2012; Wang et al., 2011a). As 1-NPYR originates mainly from primary emissions and in particular from diesel vehicles (Ringuet et al., 2012 and references therein), formation of 2-NFLT has been reported to be absent in direct combustion emissions and to be produced from the gas-phase reactions of FLT with OH radicals in presence of NO<sub>x</sub> during the day or NO<sub>3</sub> radicals at night; while 2-NPYR comes solely from the reaction of PYR with OH radicals (Ramdahl et al., 1986; Arey et al., 1986; Atkinson et al., 1987; Ciccioli et al., 1996). Accordingly, the ratio 2-NFLT/1-NPYR has been widely used, with a value greater than 5 indicating a major contribution from photochemical processes, whilst a ratio value less than 5 means an important contribution from direct emissions (Zhang et al., 2018; Bandowe et al., 2014; Ringuet et al., 2012; Wang et al., 2011a; Albinet et al., 2008).

In this study, the 2-NFLT was not quantified because the standard compound was not commercially available, subsequently, we have used 3-NFLT isomer as a substitution of 2-NFLT. A previous study reported that the





concentration of 3-NFLT compared to 2-NFLT is relatively very low (Bamford et al., 2003); in addition, the separation of both isomers (2- and 3-NFLT) using the most common GC-MS column for PAHs separation, HP-5ms and DB-5ms, was not possible (Zhang et al., 2018; Bandowe et al., 2014; Ringuet et al., 2012; Albinet et al., 2008). Hence, in this study we assume that the sum of 2- and 3-NFLT is closely representative of the original ratio 2-NFLT/1-NPYR. Therefore, we adopted the ratio 2+3NFLT/1-NPYR which was varied between 4 and 19 during the daytime (mean: 12) and from 3.6 to 30.4 in the night-time (mean: 8.8) (Fig. S3). Most daytime values have exceeded significantly the benchmark ratio of 5, while at night-time the average value was lower than average daytime value. These results could illustrate the predominance of OH-radicals-initiated reaction during the day and the dominating atmospheric formation route for 2-NFLT in presence of NO<sub>2</sub> and sunlight.

265

### 3.3 Correlation with atmospheric gas pollutants

The O<sub>3</sub>, CO, NO, NO<sub>2</sub>, SO<sub>2</sub> and HONO concentrations were also measured at the same site location (Institute of Atmospheric Physics in Beijing) as the PM<sub>2.5</sub> sampling. Sampling inlets were installed outside the containers at approximately 3-4 m above ground (Fig. S1). Online measurements of the gas phase species have been time-averaged to the filter sampling times. No correlations of significance were seen between PAHs and meteorological parameters (Relative Humidity and Temperature).

ΣPAHs and ΣOPAHs had a similar strong positive correlation (R= 0.82 to 0.98) in the 9 h and 15 h samples with CO, NO, NO<sub>2</sub>, SO<sub>2</sub> and HONO (Table S1). NO is known as an effective tracer for local traffic emissions, it is a short-lived intermediate in a variety of chemical reactions in both the troposphere and the stratosphere with an approximate residence time of 1 day (Bange 2008, Janhäll et al., 2004). CO is mainly produced from incomplete combustion and has a relatively long atmospheric lifetime (3 months on average) and has been reported to undergo long-range transport (Peng et al., 2007 and references therein). This suggests that the observed high correlations with primary pollutants NO and CO during the daytime and night-time indicate that PAHs and OPAHs are primarily emitted from traffic and can be associated with both local and regional scale emissions. In addition, similar significant correlations were observed with SO<sub>2</sub>, this gas is mostly emitted from power plants emissions outside the city with approximately 50 h (Lee et al., 2011) atmospheric residence time. This relationship could be explained by the contribution of anthropogenic sources such as the Beijing Taiyanggong thermal power station (39°58'42"N 116°26'19"E). This suggestion is in accordance with our measured air masses showing that winds arriving at the site blow from the North East for much of the time (Fig. S4).

In contrast, most of the 3 h day samples showed only moderate correlations (R=0.38 to 0.74) except for HONO where significant correlations (R=0.87 to 0.94) were observed with ΣPAHs, ΣOPAHs and ΣNPAHs (Fig. 5; Table S1). Furthermore, HONO was significantly correlated with PM<sub>2.5</sub> during the daytime (Fig. 5). In light with these findings, a strong chemical link between HONO emissions and ambient particles (PM<sub>2.5</sub>) can be concluded. A similar conclusion was drawn from recent study in Beijing (Zhang et al., 2019) which suggested a potential chemical relationship between HONO and haze particles (PM<sub>2.5</sub>) and proposed a high contribution from vehicle emissions to the night-time HONO.



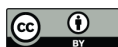

For NPAHs, no significant correlation was found in 3 h and 15 h time sampling resolution, except with HONO, where a significant difference between day and night were observed. Surprisingly, the 9 h time resolution showed a strong correlation with CO, NO, NO<sub>2</sub> and SO<sub>2</sub>, potentially suggesting a direct emission of NPAHs. More likely these correlations arise because of a formation delay of NPAHs that is smoothed out by the longer daytime sampling period. In a previous study, Zimmermann et al., (2013) reported the formation of NPAHs from the heterogeneous interaction of ambient particle bound-PAHs with atmospheric oxidant. In line with the observed high values for the ratio 2+3NFLT/1-NPYR (section 3.2) and the trace levels of NPAHs concentrations in the atmosphere; the secondary formation of NPAHs by gas phase reactions followed by adsorption on particles and in parallel the heterogeneous formation on the surface of particles is supported rather than primary emissions.

HONO plays a key role in tropospheric photochemistry, however its sources and their relative contributions to ambient HONO are still unclear, especially in the daytime. To help understand the mechanism of HONO formation in the atmosphere, each NPAHs compound has been correlated with HONO concentrations. The available data in Table S2 shows diurnal and nocturnal differences for individual correlation of NPAHs with HONO with the exception for 1-NPYR, which originates mainly from primary emissions and shows a strong correlation during the day and night. In addition, 9-Nitroanthracene had distinctive behaviour by accumulating during the night and appearing to undergo a photodegradation during the daytime (Fig. 6). 9-Nitroanthracene showed a strong positive correlation with HONO ( $R=0.90$ ,  $P<0.001$ ) in the daytime while no significant relationship was found at night-time ( $R=0.15$ ,  $P>0.05$ ). This suggests 9-nitroanthracene as a possible source of HONO during the daytime via the OH radical-initiated reaction leading to OH (Ortho) addition and followed by intramolecular hydrogen transfer from the phenolic hydroxyl group to the nitro group.

In addition, there was a significant positive correlation between ANT and 9-NANT ( $R=0.90$ , 1/3 h;  $R=0.94$ , 1/9 h;  $R=0.90$ , 1/15 h;  $P\leq 0.001$ ), which may be an indication that 9-NANT is closely related to ANT. In this respect, additional simulation chamber measurements of the gas phase reaction of ANT with NO<sub>3</sub> radicals and for 9-Nitroanthracene with OH radicals in presence of light and under different atmospheric parameters are required for more precise assessment.

317

### 3.4 Exposure assessment

The toxicity equivalency factor (TEF) represent an estimate of the relative toxicity of a chemical compared to a reference chemical. For PAHs, Benzo(a)pyrene was chosen as the reference chemical because it is known as the most carcinogenic PAH (OEHHA., 1994, 2002) and is commonly used as an indicator of carcinogenicity of total PAHs (Alves et al., 2017; Bandowe et al., 2014; Ramírez et al., 2011). The toxicity of the total PAHs expressed as BaP equivalents (BaP<sub>eq</sub>) is calculated from the TEFs of each target compound (Table S3) multiplied by its corresponding concentration Eq. (1):

$$\sum [BaP]_{eq} = \sum_{i=1}^{n=1} (C_i \times TEF_i) \quad (1)$$

where  $C_i$  correspond to the concentration of individual target compound (PAHs, OPAHs and NPAHs) in ng m<sup>-3</sup>.



327

328 A widely applied procedure of the Office of Environmental Health Hazards Assessment (OEHHA) of the  
329 California Environmental Protection Agency (CalEPA) and the World Health Organisation (WHO) was used in  
330 this study to evaluate and calculate the potential of contracting cancer from inhalation and exposure to PM<sub>2.5</sub>-  
331 bound PAHs; commonly known as the lifetime excess cancer risk (ECR) Eq. (2).

$$332 \quad ECR = \sum [BaP]_{eq} \times UR_{BaP} \quad (2)$$

333 where two values are mostly used for UR<sub>[BaP]</sub> ( $1.1 \times 10^{-6} \text{ (ng m}^{-3}\text{)}^{-1}$  (OEHHA., 2002, 2005) and  $8.7 \times 10^{-5} \text{ (ng m}^{-3}\text{)}^{-1}$   
334 (WHO., 2000)); Eq. (2) describes the inhalation unit risk associated with high probability of contracting cancer  
335 when exposed continuously to  $1 \text{ ng m}^{-3}$  of BaP<sub>eq</sub> concentration over a lifetime of 70 years.

336 As shown in Table 3, the BaP<sub>eq</sub> concentrations include the sum of 16PAHs, 1OPAH and 6NPAHs, and the cancer  
337 risk was evaluated among different sampling times according to CalEPA and WHO guidelines. The risk values  
338 may be underestimated due to lack of toxicity data for OPAHs and because our assessment excludes the gas phase  
339 contributions and are only based on the health risk evaluation of particulate phase. The average 24h BaP<sub>eq</sub> for the  
340 whole sampling period was  $23.6 \text{ ng m}^{-3}$ . 6-NCHR has not been quantified in all samples, its contribution to the  
341 total BaP<sub>eq</sub> is relatively high (mean: 8%, range: 1-24%) in comparison with the three major contributor from the  
342 PAH group: BaP (mean: 47.5%, range: 24-64%), DahA (mean: 17.8%, range: 10-32%) and BbF (mean: 10.1%,  
343 range: 7-21%). In this study, the ECR attributable to polycyclic aromatic compounds (PACs) in urban air of  
344 Beijing ranged from  $10^{-5}$  to  $10^{-3} > 10^{-6}$  suggesting a high potential cancer risk for adults (Chen and Liao., 2006;  
345 Bai et al., 2009).

346 It is worth noting that inhalation exposure is not the only risk with the potential to contract cancer to humans,  
347 other sources of exposure such as dermal contact and ingestion of the re-suspended dusts in real environmental  
348 matrices such as road dusts and soils could increase the risk value for urban residents (Wang, et al., 2011b; Wei  
349 et al., 2015). In our study, the 24h average estimated cancer risk from inhalation exposure to ambient PM<sub>2.5</sub> based  
350 on CalEPA and WHO guidelines were  $2.6 \times 10^{-5}$  and  $2.05 \times 10^{-3}$ , respectively. Hence, the highest calculated ECR  
351 ( $2.05 \times 10^{-3}$ ) estimates 2027 additional cases per million people exposed (29 cases/year) in comparison to the  
352 estimate based on CalEPA in which 26 persons (0.37 cases/year) may have a chance of cancer development.

353 ECR trends were reported in previous studies from Beijing and other populated area (Bandowe et al., 2014; Alves  
354 et al., 2017; Ramírez et al., 2011; Jia et al., 2011, Liu et al., 2015, Feng et al., 2018, Song et al., 2018). In this  
355 study we considered the combination of all samples (n=54) to estimate the average 24h cancer risk ( $\sum[BaP]_{eq}=23.6$   
356  $\pm 12 \text{ ng m}^{-3}$ ; range 8 – 44  $\text{ng m}^{-3}$ ) and compare it with previous studies. An average value of  $17 \text{ ng m}^{-3}$  (range 2-  
357  $64 \text{ ng m}^{-3}$ ) was reported for Xi'an for the whole year between July 2008 and August 2009 (Bandowe et al., 2014).  
358 After considering the same winter period (November and December) as in our study, the average values reported  
359 for Xi'an city (31-33  $\text{ng m}^{-3}$ ) were higher than our results. In contrast, our average value was comparable to those  
360 reported in a recent study in Beijing, ranging from 21 to 38  $\text{ng m}^{-3}$  in cold months (Feng et al., 2018), whilst in  
361 the previous study of Chen et al. 2017, they reported an average of  $31.4 \text{ ng m}^{-3}$  for outdoor air in Beijing in winter.  
362 Lower and more varied values have been also reported to Beijing city in winter. Liu et al. (2007) reported an  
363 average BaP<sub>eq</sub> concentration of  $13.0 \text{ ng m}^{-3}$  and  $27.3 \text{ ng m}^{-3}$  at two sampling sites on Peking University campus



and  $82.1 \text{ ng m}^{-3}$  for samples collected from busy road street. It is clear that direct comparison with Beijing air from other studies can be limited due to the number of PACs considered in each study and the differences in sampling sites and sampling periods. Other areas of uncertainty include TEF reference values and the range of BaP UR which were extrapolated from animal bioassays with limited evidence regarding the carcinogenicity to humans.

Seasonal variability is also crucial in estimating  $\text{BaP}_{\text{eq}}$  concentrations; it has been shown that  $\text{BaP}_{\text{eq}}$  values in cold months are always higher than warm months due to the increase in coal combustion, central and residential heating, lower photochemical transformation and lower volatilisation of gases favorising particle formation in winter. Previous observations in Beijing recorded  $\sum[\text{BaP}_{\text{eq}}]$  of  $11.1 \text{ ng m}^{-3}$  in autumn (Jia et al., 2011) and  $11.0 \text{ ng m}^{-3}$  in warm months (April to June) (Feng et al., 2018). In comparison with Guangzhou city (south of China),  $\text{BaP}_{\text{eq}}$  was  $9.24 \text{ ng m}^{-3}$  in winter and reported to be 1.6 and 6.2 times greater than autumn and summer, respectively (Liu et al., 2015). Our results were considerably higher than those estimated for western European cities during the winter, such as Oporto:  $3.56 \text{ ng m}^{-3}$ , Florence:  $1.39 \text{ ng m}^{-3}$  and Athens:  $0.43 \text{ ng m}^{-3}$  (Alves et al., 2017). ECR values estimated for each city were 6.6, 17 and 55 times lower than our ECR estimation. Lower ECR levels in western European cities were attributed to cleaner and renewable energy sources, less populated cities, waste exports and recycling and more efficient environmental regulations.

380

#### 381 4 Conclusions

Temporal variations and chemical composition of  $\text{PM}_{2.5}$  were measured in Beijing-China from 22 November 2016 to 9 December 2016, focusing in particular on the diurnal and nocturnal chemical formation of PAHs, OPAH and NPAHs. The 24h average concentration of  $\text{PM}_{2.5}$  was  $108 \mu\text{g m}^{-3}$  ranging from  $10$  to  $283 \mu\text{g m}^{-3}$ , exceeding the 24h limit for China on 10 days of the 18 sampling days. The 24h concentrations of  $\sum\text{PAH}_{16}$  varied between  $37$  and  $180 \text{ ng m}^{-3}$  (average  $97 \text{ ng m}^{-3}$ ), while  $\sum\text{OPAH}_{10}$  ranged from  $13$  to  $70 \text{ ng m}^{-3}$  (average  $35.62 \text{ ng m}^{-3}$ ) and  $\sum\text{NPAH}_9$  from  $0.87$  to  $4.4 \text{ ng m}^{-3}$  (average  $2.29 \text{ ng m}^{-3}$ ). Daytime concentrations during pollution episodes for PAHs, OPAHs and NPAHs were  $224$ ,  $54$ , and  $2.3 \text{ ng m}^{-3}$ , respectively. The daily concentration of BaP exceeded the 24h average limit of  $2.5 \text{ ng m}^{-3}$  for China on all sampling days in this study, indicating elevated risk of disease among inhabitants.

Diagnostic ratios of different species were used to distinguish between possible emission sources of PAHs. Coal combustion and road traffic emissions (petrol engines) were found overall to be the two dominant sources. In addition, the high ratios of  $2+3\text{NFLT}/1\text{-NPYR}$  observed reveal the significance of secondary formation of NPAHs, especially in daytime, and the dominance of the OH radical-initiated reaction pathway.

PAHs and OPAHs concentrations were correlated with CO, NO,  $\text{NO}_2$ ,  $\text{SO}_2$  and HONO, indicating that these compounds can be associated with both local and regional primary emissions and mostly related to traffic contribution. Correlation between  $\text{PM}_{2.5}$  and HONO suggested a possible link with  $\text{PM}_{2.5}$  as a potential source of HONO, affecting the tropospheric budget of HONO and OH radicals. The strong positive correlation between individual NPAHs and HONO during daytime was also suggestive of a potential link between these two classes

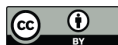

400 of chemicals in air. One of the dominant NPAHs, the 9-NANT had a distinctive behaviour, accumulating at night  
401 and photodegrading in daytime.

402 The lifetime excess cancer risk attributable to the summation of polycyclic aromatic compounds measured here  
403 and associated with PM<sub>2.5</sub> inhalations in Beijing was in the range of 10<sup>-3</sup> according to WHO guidelines, confirming  
404 that there is statistically elevated risk of contracting cancer from this class of pollutants in this location.

405

406

407 *Author contributions:* AE led the analysis and prepared the manuscript with contributions from all authors. ACL  
408 and JFH contributed to the analysis, interpretation and writing of the paper. RED provided the data on the gas  
409 phase measurements and collected the filter samples in the field. MWW supported laboratory chemical analysis  
410 on the GC-Q/ToF-MS. All authors contributed to the corrections of the paper.

411

412 *Competing interests.* The authors declare that they have no competing interests.

413

414 *Acknowledgements:* Authors gratefully acknowledge the U.K. Natural Environment Research Council for funding  
415 Air Pollution and Human Health programme, references NE/N007115/1 and NE/N006917/1. We thank Leigh  
416 Crilley and Louisa Kramer from the University of Birmingham for provision of the HONO data, funded through  
417 the APHH AIRPRO and AIRPOLL projects references NE/N007115/1 and NE/N006917/1. Authors acknowledge  
418 the staff at the Institute of Atmospheric Physics in Beijing for support.

419

420



## 421 References

- 422 Albinet, A., Leoz-Garziandia, E., Budzinski, H., Villenave, E.: Polycyclic aromatic hydrocarbons (PAHs), nitrated  
423 PAHs and oxygenated PAHs in ambient air of the Marseilles area (South of France): Concentrations and sources,  
424 *Science. of the Total. Environment.*, 384, 280–292, doi:10.1016/j.scitotenv.2007.04.028, 2007.
- 425 Albinet, A., Leoz-Garziandia, E., Budzinski, H., Villenave, E., Jaffrezou, J. L.: Nitrated and oxygenated derivatives  
426 of polycyclic aromatic hydrocarbons in the ambient air of two French alpine valleys Part 1: Concentrations,  
427 sources and gas/particle partitioning, *Atmospheric. Environment.* 42, 43–54,  
428 doi:10.1016/j.atmosenv.2007.10.009, 2008.
- 429 Abbas, I., Badran, G., Verdin, A., Ledoux, F., Roumie, M., Courcot, D.: Polycyclic aromatic hydrocarbon  
430 derivatives in airborne particulate matter: sources, analysis and toxicity, *Environmental. Chemistry. Letters.*, 16,  
431 439–475 doi.org/10.1007/s10311-017-0697-0, 2018.
- 432 Alves, C. A., Vicente, A. M., Custódio, D., Cerqueira, M., et al.: Polycyclic aromatic hydrocarbons and their  
433 derivatives (nitro-PAHs, oxygenated PAHs, and azaarenes) in PM<sub>2.5</sub> from Southern European cities, *Science. of*  
434 *the Total. Environment.* 595, 494–504, doi:10.1016/j.scitotenv.2017.03.256, 2017.
- 435 Atkinson, R., and Arey, J.: Atmospheric chemistry of gas-phase polycyclic aromatic hydrocarbons: formation of  
436 atmospheric mutagens, *Environ. Health. Perspect.*, 102, 117–126, 1994.
- 437 Atkinson, R., Arey, J., Zielinska, B., Aschmann, S. M.: Kinetics and nitro-products of the gas-phase OH and NO<sub>3</sub>  
438 radical-initiated reactions of naphthalene-d<sub>8</sub>, fluoranthene-d<sub>10</sub>, and pyrene, *Int. J. Chem. Kinet.*, 22, 999–1014,  
439 1990.
- 440 Atkinson, R., Arey, J., Zielinska, B., Pitts Jr, J.N., Winer, A.M.: Evidence for the transformation of polycyclic  
441 organic matter in the atmosphere, *Atmospheric. Environment.*, 21, 2261–2262, doi:10.1016/0004-  
442 6981(87)90357-X, 1987.
- 443 Andreou, G., Rapsomanikis, S.: Polycyclic aromatic hydrocarbons and their oxygenated derivatives in the urban  
444 atmosphere of Athens, *Journal. of Hazardous. Materials.*, 172, 363–373, doi:10.1016/j.jhazmat.2009.07.023,  
445 2009.
- 446 Arey, J., Zielinska, B., Atkinson, R., Winer, A. M., Ramdahl, T., Pitts Jr, J. N.: The formation of nitro-PAH from  
447 the gas-phase reactions of fluoranthene and pyrene with the OH radical in the presence of NO<sub>x</sub>, *Atmospheric.*  
448 *Environment.*, 20, 2339–2345, doi: 10.1016/0004-6981(86)90064-8, 1986.
- 449 Bond, T. C., Streets, D. G., Yarber, K. F., Nelson, S. M., Woo, J. H., Klimont, Z.: A technology-based global  
450 inventory of black and organic carbon emissions from combustion, *J. Geophys. Res.*, 109, D14203,  
451 doi:10.1029/2003JD003697, 2004.
- 452 Bandowe, B.A.M., Meusel, H., Huang, R. J., Ho, K., Cao, J., Hoffmann, T., Wilcke, W.: PM<sub>2.5</sub>-bound oxygenated  
453 PAHs, nitro-PAHs and parent-PAHs from the atmosphere of a Chinese megacity: Seasonal variation, sources and  
454 cancer risk assessment, *Science. of the Total. Environment.*, 473–474, 77–87, doi:  
455 10.1016/j.scitotenv.2013.11.108, 2014.



- 456 Benbrahim-Tallaa, L., Baan, R. A., Grosse, Y., Lauby-Secretan, B., El Ghissassi, F., Bouvard, V., et al.:  
457 Carcinogenicity of diesel-engine and gasoline-engine exhausts and some nitroarenes, *Lancet. Oncol.*, 13, 663–  
458 664, doi:10.1016/S1470-2045(12)70280-2, 2012.
- 459 Bai, Z., Hu, Y., Yu, H., Wu, N., You, Y.: Quantitative health risk assessment of inhalation exposure to polycyclic  
460 aromatic hydrocarbons on citizens in Tianjin, China. *Bull. Environ. Contam. Toxicol.* 83, 151–154, doi:  
461 10.1007/s00128-009-9686-8, 2009.
- 462 Bamford, H. A. and Baker, J. E.: Nitro-polycyclic aromatic hydrocarbon concentrations and sources in urban and  
463 suburban atmospheres of the Mid-Atlantic region. *Atmospheric. Environment.*, 37, 2077–2091.  
464 doi:10.1016/S1352-2310(03)00102-X, 2003.
- 465 Bange, H.: Chapter 2 - Gaseous Nitrogen Compounds (NO, N<sub>2</sub>O, N<sub>2</sub>, NH<sub>3</sub>) in the Ocean in Nitrogen in the Marine  
466 Environment (Second Edition), 51-94, 2008.
- 467 Chen, S.C. and Liao, C.M.: Health risk assessment on human exposed to environmental polycyclic aromatic  
468 hydrocarbons pollution sources, *Science. of the Total. Environment.* 366, 112–123,  
469 doi:10.1016/j.scitotenv.2005.08.047, 2006.
- 470 Chen, Y., Li, X., Zhu, T., Han, Y., Lv, D.: PM<sub>2.5</sub>-bound PAHs in three indoor and one outdoor air in Beijing:  
471 Concentration, source and health risk assessment, *Science of the Total Environment* 586, 255–264,  
472 doi:10.1016/j.scitotenv.2017.01.214, 2017.
- 473 Chiang, H.L., Lai, Y.M., Chang, S.Y.: Pollutant constituents of exhaust emitted from light-duty diesel vehicles,  
474 *Atmospheric. Environment.* 47, 399-406, doi:10.1016/j.atmosenv.2011.10.045, 2012.
- 475 Ciccioli, P., Cecinato, A., Brancaleoni, E., Frattoni, M., Zacchei, P., Miguel, A.H.: Formation and transport of 2-  
476 nitrofluoranthene and 2-nitropyrene of photochemical origin in the troposphere, *J. Geophys. Res.*, 101, 19567–  
477 19581, doi: 10.1029/95JD02118, 1996.
- 478 Durant, J.L., Busby Jr, W.F., Lafleur, A.L., Penman, B.W., Crespi, C.L.: Human cell mutagenicity of oxygenated,  
479 nitrated and unsubstituted polycyclic aromatic hydrocarbons associated with urban aerosols, *Mutat. Res. Genet.*  
480 *Toxicol.*, 371, 123-157, doi:10.1016/S0165-1218(96)90103-2, 1996.
- 481 Farren, N.J., Ramírez, N., Lee, J.D., Finessi, E., Lewis, A.C., Hamilton, J.F.: Estimated Exposure Risks from  
482 Carcinogenic Nitrosamines in Urban Airborne Particulate Matter, *Environ. Sci. Technol.*, 49, 9648–9656, doi:  
483 10.1021/acs.est.5b01620, 2015.
- 484 Feng, B., Li, L., Xu, H., Wang, T, Wu, R., Chen, J., Zhang, Y., Liu, S., Ho, S.S.H., Cao, J., Huang, W.: PM<sub>2.5</sub>-  
485 bound polycyclic aromatic hydrocarbons (PAHs) in Beijing: Seasonal variations, sources, and risk assessment,  
486 *Journal. of Environmental. Sciences.*, 77, 11-19, doi:10.1016/j.jes.2017.12.025, 2018.
- 487 Feng, J., Chan, C. K., Fang, M., Hu, M., He, L., Tang, X.: Impact of meteorology and energy structure on solvent  
488 extractable organic compounds of PM<sub>2.5</sub> in Beijing, China, *Chemosphere.* 61, 623–632,  
489 doi:10.1016/j.chemosphere.2005.03.067, 2005.



- 490 Garrido-Frenich. A., Romero-González. R., Martínez-Vidal, J.L., Plaza-Bolaños. P., Cuadros-Rodríguez. L.,  
491 Herrera-Abdo. M.A.: Characterization of recovery profiles using gas chromatography-triple quadrupole mass  
492 spectrometry for the determination of pesticide residues in meat samples, *Journal. of Chromatography. A.*, 1133,  
493 315–321 doi:10.1016/j.chroma.2006.08.039, 2006.
- 494 Gao, Y., Ji, H.: Characteristics of polycyclic aromatic hydrocarbons components in fine particle during heavy  
495 polluting phase of each season in urban Beijing, *Chemosphere.*, 212, 346–357,  
496 doi:10.1016/j.chemosphere.2018.08.079, 2018.
- 497 Hester, R.E., Harrison, R. M., Larsen J.C., Larsen P.B.: Air Pollution and Health, Chapter Chemical carcinogens,  
498 Royal. Society. of Chemistry., 33–56, doi:10.1039/9781847550095, 1998.
- 499 Hamra, G. B., Guha, N., Cohen, A., Laden, F., et al.: Outdoor particulate matter exposure and lung cancer: a  
500 systematic review and meta-analysis, *Environ. Health. Perspect.*, 122, 906–911, doi:10.1289/ehp.1408092, 2014.
- 501 Hannigan, M.P., Cass, G.R., Penman, B.W., Crespi, C.L., Lafleur, A.L., Busby, J. W., et al.: Bioassay-directed  
502 chemical analysis of los angeles airborne particulate matter using a human cell mutagenicity assay, *Environ. Sci.*  
503 *Technol.*, 32, 3502–14, 1998.
- 504 Jia, Y., Stone, D., Wang, W., Schrlau, J., Tao, S., Simonich, S.L.: Estimated reduction in cancer risk due to PAH  
505 exposures if source control measures during the 2008 Beijing Olympics were sustained, *Environ. Health.*  
506 *Perspect.*, 119, 815–20, 2011.
- 507 Jakober C.A., Riddle, S.G., Robert, M.A., Destailats, H., Charles, M.J., Green, P.G., Kleeman, M.J.: Quinone  
508 Emissions from Gasoline and Diesel Motor Vehicles, *Environ. Sci. Technol.*, 41, 4548–54,  
509 doi:10.1021/es062967u, 2007.
- 510 Jariyasopit, N., McIntosh, M., Zimmermann, K., Arey, J., Atkinson, R., et al.: Novel Nitro-PAH Formation from  
511 Heterogeneous Reactions of PAHs with NO<sub>2</sub>, NO<sub>3</sub>/N<sub>2</sub>O<sub>5</sub>, and OH Radicals: Prediction, Laboratory Studies, and  
512 Mutagenicity, *Environ. Sci. Technol.*, 48, 412–419, doi:10.1021/es4043808, 2014.
- 513 Janhäll, S., M. Jonsson, Å., Molnár, P., A. Svensson, E., Hallquist, M.: Size resolved traffic emission factors of  
514 submicrometer particles, *Atmospheric. Environment.*, 38, 4331–4340, doi:10.1016/j.atmosenv.2004.04.018,  
515 2004.
- 516 Kim, K. H., Jahan, S. A., Kabir, E., Brown, R. J. C.: A review of airborne polycyclic aromatic hydrocarbons  
517 (PAHs) and their human health effects, *Environment International.*, 60, 71–80, doi:10.1016/j.envint.2013.07.019,  
518 2013.
- 519 Keyte, I. J., Harrison, R. M., Lammel, G.: Chemical reactivity and long-range transport potential of polycyclic  
520 aromatic hydrocarbons – a review, *Chem. Soc. Rev.*, 42, 9333 – 9391, doi:10.1039/C3CS60147A, 2013.
- 521 Lin, Y., Zou, J., Yang, W., Li, C.Q.: A Review of Recent Advances in Research on PM<sub>2.5</sub> in China, *Int. J. Environ.*  
522 *Res. Public. Health.*, 15, 438, doi:10.3390/ijerph15030438, 2018.





- 523 Liu, J., Man, R., Ma, S., Li, J., Wu, Q., Peng, J.: Atmospheric levels and health risk of polycyclic aromatic  
524 hydrocarbons (PAHs) bound to PM<sub>2.5</sub> in Guangzhou, China, *Marine. Pollution. Bulletin.* 100, 134–143,  
525 doi:10.1016/j.marpolbul.2015.09.014, 2015.
- 526 Liu, Y., Tao, S., Yang, Y., Dou, H., Yang, Y., Coveney, R.M.: Inhalation exposure of traffic police officers to  
527 polycyclic aromatic hydrocarbons (PAHs) during the winter in Beijing, China, *Science. of the Total.*  
528 *Environment.*, 383, 98 –105, doi:10.1016/j.scitotenv.2007.05.008, 2007.
- 529 Liu, F., Beirle, S., Zhang, Q., Dörner, S., He, K., Wagner, T.: NO<sub>x</sub> lifetimes and emissions of cities and power  
530 plants in polluted background estimated by satellite observations, *Atmos. Chem. Phys.*, 16, 5283–5298,  
531 doi:10.5194/acp-16-5283-2016, 2016.
- 532 Lee, C., Martin, Randal., Donkelaar, A. V., Lee, H., et al.: SO<sub>2</sub> emissions and lifetimes: Estimates from inverse  
533 modeling using in situ and global, space-based (SCIAMACHY and OMI) observations, *J. Geophys. Res.*, 116,  
534 D06304, doi:10.1029/2010JD014758, 2011.
- 535 Marr, L.C., Grogan, L.A., Wöhrnschimmel, H., Molina, L.T., Molina, M.J.: Vehicle Traffic as a Source of  
536 Particulate Polycyclic Aromatic Hydrocarbon Exposure in the Mexico City Metropolitan Area, *Environ. Sci.*  
537 *Technol.*, 38, 2584–2592, doi: 10.1021/es034962s, 2004.
- 538 Ministry of Ecology and Environment The People's Republic of China. Ambient air quality standards (GB-3095-  
539 2012),  
540 [http://english.mee.gov.cn/Resources/standards/Air\\_Environment/quality\\_standard1/201605/t20160511\\_337502.](http://english.mee.gov.cn/Resources/standards/Air_Environment/quality_standard1/201605/t20160511_337502.shtml)  
541 [shtml](http://english.mee.gov.cn/Resources/standards/Air_Environment/quality_standard1/201605/t20160511_337502.shtml)
- 542 Niu, X., Ho, S. S. H., Ho, K. F., Huang, Y., Sun, J., Wang, Q., et al.: Atmospheric levels and cytotoxicity of  
543 polycyclic aromatic hydrocarbons and oxygenated-PAHs in PM<sub>2.5</sub> in the Beijing-Tianjin-Hebei region,  
544 *Environmental. Pollution.*, 231, 1075–1084, doi: 10.1016/j.envpol.2017.08.099, 2017.
- 545 Nyiri, Z., Novák, M., Bodai, Z., Szabó, B. S., Eke, Z., Záray, G., Szigeti, T.: Determination of particulate phase  
546 polycyclic aromatic hydrocarbons and their nitrated and oxygenated derivatives using gas chromatography–mass  
547 spectrometry and liquid chromatography–tandem mass spectrometry, *Journal. of Chromatography. A.*, 1472, 88–  
548 98, doi: 10.1016/j.chroma.2016.10.021, 2016.
- 549 Nisbet, I.C.T., LaGoy, P.K.: Toxic equivalency factors (TEFs) for polycyclic aromatic hydrocarbons (PAHs),  
550 *Regul. Toxicol. Pharmacol.*, 16, 290–300, doi:10.1016/0273-2300(92)90009-X, 1992.
- 551 Office of Environmental Health Hazard Assessment (OEHHA): Benzo[a]pyrene as a Toxic Air Contaminant.  
552 Available from: <https://oehha.ca.gov/media/downloads/air/document/benzo5ba5dpyrene.pdf>, 1994.
- 553 Office of Environmental Health Hazard Assessment (OEHHA): Air Toxics Hot Spots Program Risk Assessment  
554 Guidelines. Part II: Technical Support Document for Describing Available Cancer Potency Factors. Office of  
555 Environmental Health Hazard Assessment. <https://oehha.ca.gov/media/downloads/crnrtsdnov2002.pdf>, 105–109,  
556 2002.



- 557 Office of Environmental Health Hazard Assessment (OEHHHA): Air Toxics Hot Spots Program Risk Assessment
- 558 Guidelines. Part II: Technical Support Document for Describing Available Cancer Potency Factors. Office of
- 559 Environmental Health Hazard Assessment. <https://oehha.ca.gov/media/downloads/crn/may2005hotspots.pdf>, (8
- 560 and A1), 2005.
- 561 Pio, C.A., Alves, C.A., Duarte, A.C.: Identification, abundance and origin of atmospheric organic particulate
- 562 matter in a Portuguese rural area, *Atmos. Environ.*, 35, 1365–1375, [https://doi.org/10.1016/S1352-](https://doi.org/10.1016/S1352-2310(00)00391-5)
- 563 2310(00)00391-5, 2001.
- 564 Pietrogrande, M. C., Abbaszade, G., Schnelle-Kreis, J., Bacco, D., Mercuriali, M., Zimmermann, R.: Seasonal
- 565 variation and source estimation of organic compounds in urban aerosol of Augsburg, Germany, *Environmental*.
- 566 *Pollution.*, 159, 1861–1868, doi:10.1016/j.envpol.2011.03.023, 2011.
- 567 Peng, L., Zhao, C., Lin, Y., Zheng, X., Tie, X., Chan, L. Y.: Analysis of carbon monoxide budget in North China.
- 568 *Chemosphere.* 66, 1383–1389, doi:10.1016/j.chemosphere.2006.09.055, 2007.
- 569 Purohit, V., Basu, A. K.: Mutagenicity of Nitroaromatic Compounds, *Chem. Res. Toxicol.*, 13, 673–692, 2000.
- 570 Poulain, L., Iinuma, Y., Müller, K., Birmili, W., et al.: Diurnal variations of ambient particulate wood burning
- 571 emissions and their contribution to the concentration of Polycyclic Aromatic Hydrocarbons (PAHs) in Seiffen,
- 572 Germany, *Atmos. Chem. Phys.*, 11, 12697–12713, doi:10.5194/acp-11-12697-2011, 2011.
- 573 Ramírez, N., Vallecillos, L., Lewis, A.C., Borrull, F., Marcé, R. M., Hamilton, J. F.: Comparative study of
- 574 comprehensive gas chromatography-nitrogen chemiluminescence detection and gas chromatography-ion trap-
- 575 tandem mass spectrometry for determining nicotine and carcinogen organic nitrogen compounds in thirdhand
- 576 tobacco smoke, *Journal. of Chromatography. A.*, 1426, 191–200, doi:10.1016/j.chroma.2015.11.035, 2015.
- 577 Ramírez, N., Cuadras, A., Rovira, Enric., Marcé, R.M., Borrull, F.: Risk Assessment Related to Atmospheric
- 578 Polycyclic Aromatic Hydrocarbons in Gas and Particle Phases near Industrial Sites, *Environmental. Health*.
- 579 *Perspectives.*, 119, doi:10.1289/ehp.1002855, 2011.
- 580 Raaschou-Nielsen, O., Andersen, N.Z., Beelen, R., et al.: Air pollution and lung cancer incidence in 17 European
- 581 cohorts: prospective analyses from the European Study of Cohorts for Air Pollution Effects (ESCAPE), *Lancet*.
- 582 *Oncol.*, 14, 813–822, doi: 10.1016/S1470-2045(13)70279-1, 2013.
- 583 Ringuet, J., Albinet, A., Leoz-Garziandia, E., Budzinski, H., Villenave, E.: Diurnal/nocturnal concentrations and
- 584 sources of particulate-bound PAHs, OPAHs and NPAHs at traffic and suburban sites in the region of Paris
- 585 (France), *Science. of the Total. Environment.*, 437, 297–305, doi.org/10.1016/j.scitotenv.2012.07.072, 2012.
- 586 Riva, M., Healy, R.M., Flaud, P.M., Perraudin, E., Wenger, J.C., Villenave, E.: Gas- and Particle-Phase Products
- 587 from the Chlorine-Initiated Oxidation of Polycyclic Aromatic Hydrocarbons, *J. Phys. Chem. A.*, 119, 11170-
- 588 11181, doi:10.1021/acs.jpca.5b04610, 2015.
- 589 Ramdahl, T., Zielinska, B., Arey, J., Atkinson, R., Winer, A. M., Pitts Jr, J. N.: Ubiquitous occurrence of 2-
- 590 nitrofluoranthene and 2-nitropyrene in air, *Nature.*, 321, 425–427, 1986.



- 591 Shen, G., Tao, S., Wei, S., Zhang, Y., Wang, R., Wang, B., et al.: Emissions of parent, nitro, and oxygenated  
592 polycyclic aromatic hydrocarbons from residential wood combustion in rural China, *Environ. Sci. Technol.*, 46,  
593 8123–30, doi:10.1021/es301146v, 2012.
- 594 Sasaki, J., Aschmann, SM., Kwok, E.S.C., Atkinson, R., Arey, J.: Products of the gas-phase OH and NO<sub>3</sub> radical-  
595 initiated reactions of naphthalene, *Environ. Sci. Technol.*, 31, 3173–9, 1997.
- 596 Saikawa, E., Naik, V., Horowitz, L. W., Liu, J. F., Mauzerall, D. L.: Present and potential future contributions of  
597 sulfate, black and organic carbon aerosols from China to global air quality, premature mortality and radiative  
598 forcing, *Atmos. Environ.*, 43, 2814–2822, doi:10.1016/j.atmosenv.2009.02.017, 2009.
- 599 Sharma, H., Jain, V.K., Khan, Z.H.: Characterization and source identification of polycyclic aromatic  
600 hydrocarbons (PAHs) in the urban environment of Delhi, *Chemosphere.*, 66, 302–310,  
601 doi:10.1016/j.chemosphere.2006.05.003, 2007.
- 602 Song, H., Zhang, Y., Luo, M., Gu, J., Wu, M., Xu, D., Xu, G., Ma, L.: Seasonal variation, sources and health risk  
603 assessment of polycyclic aromatic hydrocarbons in different particle fractions of PM<sub>2.5</sub> in Beijing, China,  
604 *Atmospheric Pollution Research.*, 10, 105–114, doi:10.1016/j.apr.2018.06.012, 2019.
- 605 Tobiszewski, M., Namieśnik, J.: PAH diagnostic ratios for the identification of pollution emission sources,  
606 *Environmental. Pollution.*, 162, 110–119, doi:10.1016/j.envpol.2011.10.025, 2012.
- 607 Tsapakis, M. and Stephanou, E. G. Collection of gas and particle semi-volatile organic compounds: use of an  
608 oxidant denuder to minimize polycyclic aromatic hydrocarbons degradation during high-volume air sampling,  
609 *Atmos. Environ.*, 37, 4935–4944, doi:10.1016/j.atmosenv.2003.08.026, 2003.
- 610 Tsapakis, M., and Stephanou, E. G: Diurnal Cycle of PAHs, Nitro-PAHs, and oxy-PAHs in a High Oxidation  
611 Capacity Marine Background Atmosphere, *Environ. Sci. Technol.*, 41, 8011–8017, doi: 10.1021/es071160e,  
612 2007.
- 613 Tian, Y., Xiao, Z., Wang, H., et al.: Influence of the sampling period and time resolution on the PM source  
614 apportionment: Study based on the high time-resolution data and long-term daily data, *Atmos. Environ.*, 165, 301–  
615 309, doi:10.1016/j.atmosenv.2017.07.003, 2017.
- 616 World Health Organization (WHO), outdoor air pollution, IARC Monographs on the Evaluation of Carcinogenic  
617 Risks to Humans, International Agency for Research on Cancer., 109, 2016.
- 618 World Health Organization (WHO), Air Quality Guidelines for Europe. 2<sup>nd</sup> ed. Copenhagen: WHO, Regional  
619 Office for Europe (Copenhagen). [http://www.euro.who.int/\\_\\_data/assets/pdf\\_file/0005/74732/E71922.pdf](http://www.euro.who.int/__data/assets/pdf_file/0005/74732/E71922.pdf),  
620 Chapter 5, 92 – 94, 2000.
- 621 Wenyan, Chen., and Tong Zhu.: Formation of Nitroanthracene and Anthraquinone from the Heterogeneous  
622 Reaction Between NO<sub>2</sub> and Anthracene Adsorbed on NaCl Particles, *Environ. Sci. Technol.*, 48, 8671–8678,  
623 doi:10.1021/es501543g, 2014.
- 624 Wang, G., Kawamura, K., Lee, S., Ho, K., Cao, J.: Molecular, Seasonal, and Spatial Distributions of Organic  
625 Aerosols from Fourteen Chinese Cities, *Environ. Sci. Technol.*, 40, 4619–4625, doi:10.1021/es060291x, 2006.



- 626 Wang, W., Jariyasopit, N., Schrlau, J., Jia, Y., Tao, S., Yu, T.W., et al.: Concentration and Photochemistry of  
627 PAHs, NPAHs, and OPAHs and Toxicity of PM<sub>2.5</sub> during the Beijing Olympic Games, Environ. Sci. Technol.,  
628 45, 6887–95, doi:10.1021/es201443z, 2011a.
- 629 Wang, W., Huang, M.J., Kang, Y., Wang, H.S., Leung, A.O.W., Cheung, K.C., Wong, M.H.: Polycyclic aromatic  
630 hydrocarbons (PAHs) in urban surface dust of Guangzhou, China: Status, sources and human health risk  
631 assessment, Science. of the Total. Environment., 409, 4519–4527, doi:10.1016/j.scitotenv.2011.07.030, 2011b.
- 632 Wei, C., Bandowe, B.A.M., Han Y., Cao, J., Zhan, C., Wilcke, W.: Polycyclic aromatic hydrocarbons (PAHs)  
633 and their derivatives (alkyl-PAHs, oxygenated-PAHs, nitrated-PAHs and azaarenes) in urban road dusts from  
634 Xi'an, Central China, Chemosphere., 134, 512–520, doi:10.1016/j.chemosphere.2014.11.052, 2015.
- 635 Wang, W., Simonich, S.L.M., Wang, W., Giri, B., Zhao, J., Xue, M., Cao, J., Lu, X., Tao, S.: Atmospheric  
636 polycyclic aromatic hydrocarbon concentrations and gas/particle partitioning at background, rural village and  
637 urban sites in the North China Plain, Atmospheric. Research., 99, 197–206, doi:10.1016/j.atmosres.2010.10.002,  
638 2011C.
- 639 Wu, Y., Yang, L., Zheng, X., Zhang, S., Song, S., Li, J., Hao, J.: Characterization and source apportionment of  
640 particulate PAHs in the roadside environment in Beijing, Science of the Total Environment 470–471, 76–83, doi:  
641 10.1016/j.scitotenv.2013.09.066, 2014.
- 642 Xu, S.S., Liu, W.X., Tao, S.: Emission of polycyclic aromatic hydrocarbons in China, Environ. Sci. Technol., 40,  
643 702–708, doi:10.1021/es0517062, 2006.
- 644 Yunker, M.B., Macdonald, R.W., Vingarzanc, R., Mitchell, R.H., Goyette, D., Sylvestre, S.: PAHs in the Fraser  
645 River basin: a critical appraisal of PAH ratios as indicators of PAH source and composition, Org. Geochem., 33,  
646 489–515, doi:10.1016/S0146-6380(02)00002-5, 2002.
- 647 Zimmermann, K., Jariyasopit, N., Massey Simonich, S. L., Tao, S., Atkinson, R., Arey, J.: Formation of Nitro-  
648 PAHs from the Heterogeneous Reaction of Ambient Particle-Bound PAHs with N<sub>2</sub>O<sub>5</sub>/NO<sub>3</sub>/NO<sub>2</sub>, Environ. Sci.  
649 Technol., 47, 8434–8442, doi:10.1021/es401789x, 2013.
- 650 Zhang, Y. X., Tao, S.: Global atmospheric emission inventory of polycyclic aromatic hydrocarbons (PAHs) for  
651 2004, Atmos. Environ., 43, 812–819, doi:10.1016/j.atmosenv.2008.10.050, 2009.
- 652 Zhang, J., Yang, L., Mellouki, A., Chen, J., Chen, X., Gao, Y., Jiang, P., Li, Y., Yu, H., Wang, W.: Atmospheric  
653 PAHs, NPAHs, and OPAHs at an urban, mountainous, and marine sites in Northern China: Molecular  
654 composition, sources, and ageing, Atmos. Environ., 173, 256–264, doi:10.1016/j.atmosenv.2017.11.002, 2018.
- 655 Zhang, W., Tong, S., Ge, M., An, J., Shi, Z., Hou, S., Xia, K., Qu, Y., Zhang, H., Chu, B., Sun, Y., He, H.:  
656 Variations and sources of nitrous acid (HONO) during a severe pollution episode in Beijing in winter 2016,  
657 Science. of the Total. Environment., 648, 253–262, doi: 10.1016/j.scitotenv.2018.08.133, 2019.
- 658



659

660

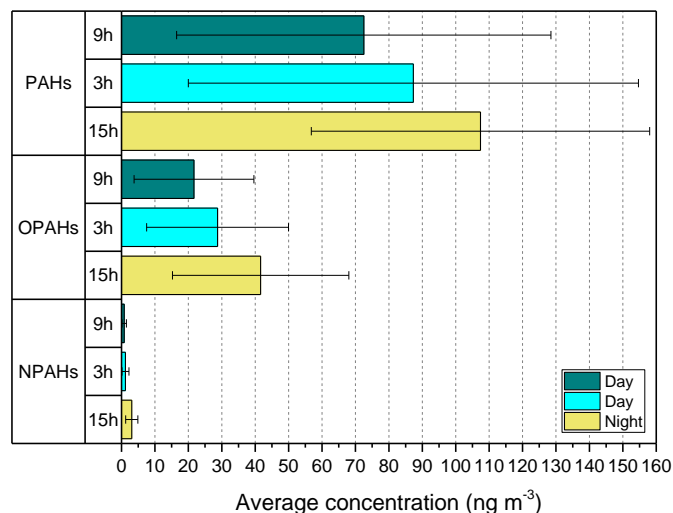

661

662 **Figure 1.** Average distribution diagram of  $\Sigma$ PAHs,  $\Sigma$ OPAHs and  $\Sigma$ NPAHs in  $PM_{2.5}$  samples during the daytime (1/3  
 663 h; 1/9 h) and night-time (1/15 h). Error bars reflect standard deviations.

664

665

666

667 **Table 1.** List of measured PAHs, OPAHs and NPAHs and their Abbreviations. Compounds are listed in order of  
 668 elution.

| Compound/Formula                     | Abbreviation | Accurate Mass ( $m/z$ )    | %RSD     |          |
|--------------------------------------|--------------|----------------------------|----------|----------|
| 16 PAHs                              |              | Monitored ions in EI mode  | Interday | Intraday |
| Naphthalene/ $C_{10}H_8$             | NAP          | 128.0628-127.0543-102.0464 | 4.6      | 3.2      |
| Acenaphthylene/ $C_{12}H_8$          | ACY          | 152.0629-151.0546-126.0463 | 4.1      | 2.1      |
| Acenaphthene/ $C_{12}H_{10}$         | AC           | 153.0705-154.0779-152.0634 | 5.5      | 6.1      |
| Fluorene/ $C_{13}H_{10}$             | FLU          | 166.0782-165.0708-164.0621 | 4.0      | 2.9      |
| Phenanthrene/ $C_{14}H_{10}$         | PHE          | 178.0789-176.0626-152.0622 | 4.6      | 3.0      |
| Anthracene/ $C_{14}H_{10}$           | ANT          | 178.0787-176.0627-152.0620 | 4.7      | 4.2      |
| Fluoranthene/ $C_{16}H_{10}$         | FLT          | 202.0788-200.0626-101.0388 | 1.8      | 4.5      |
| Pyrene/ $C_{16}H_{10}$               | PYR          | 202.0788-200.0626-101.0389 | 3.2      | 1.9      |
| Benzo[a]anthracene/ $C_{18}H_{12}$   | BaA          | 228.0927-226.0783-101.0388 | 6.2      | 1.2      |
| Chrysene/ $C_{18}H_{12}$             | CHR          | 228.0943-226.0784-101.0387 | 6.0      | 2.6      |
| Benzo[b]fluoranthene/ $C_{20}H_{12}$ | BbF          | 252.0941-250.0784-126.0467 | 4.7      | 2.0      |

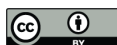

|                                                                            |          |                            |     |     |
|----------------------------------------------------------------------------|----------|----------------------------|-----|-----|
| Benzo[k]fluoranthene/C <sub>20</sub> H <sub>12</sub>                       | BkF      | 252.0940-250.0783-126.0468 | 8.9 | 8.7 |
| Benzo[a]pyrene/C <sub>20</sub> H <sub>12</sub>                             | BaP      | 252.0940-250.0783-126.0466 | 5.2 | 2.3 |
| Indeno[1,2,3-cd]pyrene/C <sub>22</sub> H <sub>12</sub>                     | IcdP     | 276.0939-274.0783-138.0467 | 7.2 | 2.6 |
| Dibenz[a,h]anthracene/C <sub>22</sub> H <sub>14</sub>                      | DahA     | 278.1097-276.0941-139.0545 | 7.7 | 4.3 |
| Benzo[ghi]perylene/C <sub>22</sub> H <sub>12</sub>                         | BghiP    | 276.0942-274.0783-138.0467 | 5.4 | 2.6 |
| 10 OPAHs                                                                   |          | Monitored ions in NCI mode |     |     |
| 1,4-Naphthoquinone/C <sub>10</sub> H <sub>6</sub> O <sub>2</sub>           | 1,4-NAQ  | 158.0420                   | 6.3 | 5.1 |
| 1-Naphthaldehyde/C <sub>11</sub> H <sub>8</sub> O                          | 1-NALD   | 156.0557                   | 8.9 | 7.8 |
| 9-Fluorenone/C <sub>13</sub> H <sub>8</sub> O                              | 9-FLON   | 180.0639                   | 5.7 | 6.2 |
| 9,10-Anthraquinone/C <sub>14</sub> H <sub>8</sub> O <sub>2</sub>           | 9,10-ANQ | 208.0572                   | 5.6 | 3.2 |
| 1,8-Naphthalic anhydride/<br>C <sub>12</sub> H <sub>6</sub> O <sub>3</sub> | 1,8-NANY | 198.0436                   | 6.4 | 5.6 |
| Phenanthrene-9-<br>carboxaldehyde/C <sub>15</sub> H <sub>10</sub> O        | PHCA     | 206.0777                   | 5.4 | 4.9 |
| Benzo[a]fluorenone/ C <sub>17</sub> H <sub>10</sub> O                      | BaFLU    | 230.0791                   | 6.4 | 3.2 |
| 7H-Benz[de]anthracene-7-one/<br>C <sub>17</sub> H <sub>10</sub> O          | BANTone  | 230.0781                   | 7.2 | 5.8 |
| 1-Pyrenecarboxaldehyde/ C <sub>17</sub> H <sub>10</sub> O                  | 1-PYRCA  | 230.0786                   | 7.5 | 7.2 |
| 1,2-Benzanthraquinone/<br>C <sub>18</sub> H <sub>10</sub> O <sub>2</sub>   | 1,2-BANQ | 258.0743                   | 8.5 | 7.4 |
| 9 NPAHs                                                                    |          | Monitored ions in NCI mode |     |     |
| 1-Nitronaphthalene/C <sub>10</sub> H <sub>7</sub> NO <sub>2</sub>          | 1-NNAP   | 173.0551                   | 4.7 | 4.4 |
| 3-Nitrodibenzofuran/ C <sub>12</sub> H <sub>7</sub> NO <sub>3</sub>        | 3-NDBF   | 213.0475                   | 4.4 | 5.1 |
| 5-Nitroacenaphthene/ C <sub>12</sub> H <sub>9</sub> NO <sub>2</sub>        | 5-NAC    | 199.0682                   | 5.6 | 5.3 |
| 2-Nitrofluorene/C <sub>13</sub> H <sub>9</sub> NO <sub>2</sub>             | 2-NFLU   | 211.0689                   | 5.0 | 5.4 |
| 9-Nitroanthracene/C <sub>14</sub> H <sub>9</sub> NO <sub>2</sub>           | 9-NANT   | 223.0697                   | 5.9 | 3.9 |
| 3-Nitrofluoranthene/C <sub>16</sub> H <sub>9</sub> NO <sub>2</sub>         | 3-NFLT   | 247.0688                   | 6.4 | 4.1 |
| 1-Nitropyrene/C <sub>16</sub> H <sub>9</sub> NO <sub>2</sub>               | 1-NPYR   | 247.0691                   | 3.9 | 3.2 |
| 6-Nitrochrysene/C <sub>18</sub> H <sub>11</sub> NO <sub>2</sub>            | 6-NCHR   | 273.0847                   | 4.7 | 5.4 |
| 6-Nitrobenzo[a]pyrene/<br>C <sub>20</sub> H <sub>11</sub> NO <sub>2</sub>  | 6-NBaP   | 297.0845                   | 8.4 | 9.7 |



671

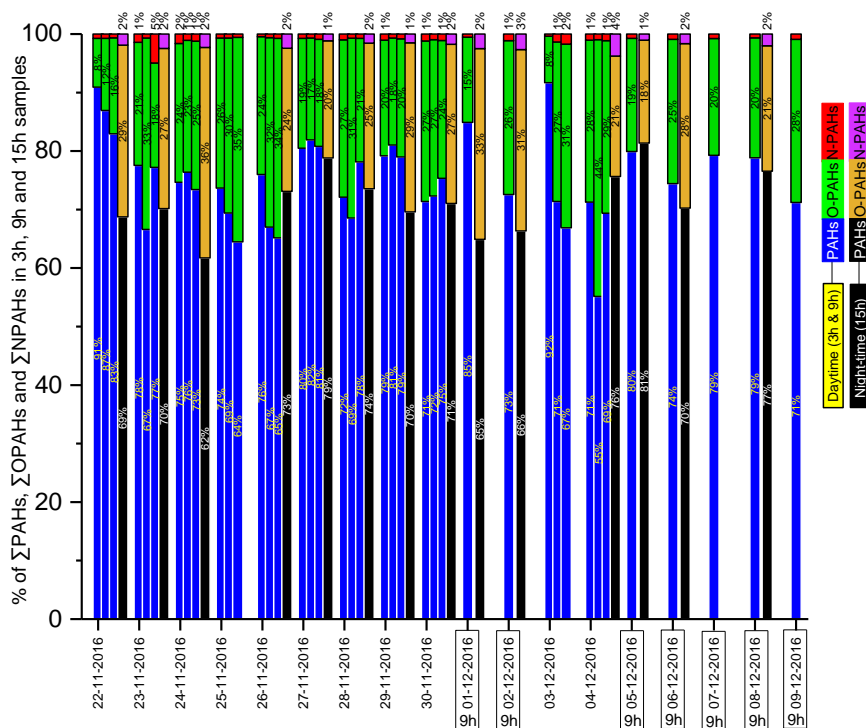

672 **Figure 2. Temporal profile of ΣPAHs, ΣOPAHs and ΣNPAHs in PM<sub>2.5</sub> samples during the daytime and night-time.**  
 673 **Percentage below 1% for NPAHs are omitted for clarity.**

674

675

676





677

678

679

680 **Table 2. Minimum, maximum and average atmospheric concentrations of PAHs, OPAHs and NPAHs in PM<sub>2.5</sub>.**681 **Compounds in bold represent the highest mean contribution to the sum of all compounds.**

| Compound                    | Concentrations (ng m <sup>-3</sup> )     |                               | Average contribution<br>to total (%) |
|-----------------------------|------------------------------------------|-------------------------------|--------------------------------------|
|                             | Minimum-maximum                          | Average                       |                                      |
| 16 PAHs                     | (3 h)/(9 h)/(15 h)                       | (3 h)/(9 h)/(15 h)            | (3 h)/(9 h)/(15 h)                   |
| NAP                         | (0.05-0.8)/(0.1-0.4)/(0.06-0.6)          | (0.31)/(0.24)/(0.27)          | (0.48)/(0.39)/(0.25)                 |
| ACY                         | (0.01-1.2)/(0.1-0.8)/(0.1-1.2)           | (0.31)/(0.31)/(0.58)          | (0.35)/(0.46)/(0.50)                 |
| AC                          | (0.03-0.13)/(0.02-0.09)/(0.01-0.2)       | (0.07)/(0.04)/(0.07)          | (0.15)/(0.08)/(0.06)                 |
| FLU                         | (0.05-1.3)/(0.1-1.0)/(0.1-1.5)           | (0.43)/(0.41)/(0.63)          | (0.53)/(0.65)/(0.56)                 |
| <b>PHE</b>                  | <b>(1.2-23.1)/(1.9-16.3)/(1.5-13.7)</b>  | <b>(7.38)/(6.30)/(8.40)</b>   | <b>(8.83)/(9.04)/(7.84)</b>          |
| ANT                         | (0.5-3.4)/(0.3-1.9)/(0.3-2.9)            | (1.07)/(0.79)/(1.43)          | (1.48)/(1.23)/(1.32)                 |
| <b>FLT</b>                  | <b>(1.4-41.8)/(3.0-17.6)/(3.2-11.7)</b>  | <b>(12.86)/(9.10)/(8.97)</b>  | <b>(13.93)/(13.96)/(9.67)</b>        |
| <b>PYR</b>                  | <b>(0.7-34.6)/(2.1-15.7)/(2.9-10.7)</b>  | <b>(9.85)/(7.48)/(8.09)</b>   | <b>(10.36)/(11.04)/(8.69)</b>        |
| <b>BaA</b>                  | <b>(1.3-27.7)/(1.3-17.5)/(2.1-18.8)</b>  | <b>(6.69)/(6.52)/(12.03)</b>  | <b>(7.17)/(8.23)/(11.04)</b>         |
| <b>CHR</b>                  | <b>(1.4-37.5)/(2.1-20.8)/(2.7-15.9)</b>  | <b>(10.49)/(9.17)/(11.27)</b> | <b>(11.23)/(12.38)/(10.78)</b>       |
| <b>BbF</b>                  | <b>(1.5-35.3)/(2.1-21.3)/(2.3-20.4)</b>  | <b>(10.34)/(8.93)/(10.79)</b> | <b>(11.19)/(11.76)/(10.42)</b>       |
| BkF                         | (1.6-15.4)/(1.2-7.4)/(1.3-6.6)           | (5.51)/(3.94)/(4.30)          | (6.76)/(5.80)/(4.43)                 |
| <b>BaP</b>                  | <b>(1.4-37.3)/(1.5-20.7)/(3.2-35.2)</b>  | <b>(8.81)/(8.40)/(18.91)</b>  | <b>(9.12)/(10.28)/(16.15)</b>        |
| IcdP                        | (1.7-16.1)/(0.9-11.6)/(1.0-18.3)         | (4.79)/(4.65)/(9.75)          | (6.06)/(5.70)/(8.03)                 |
| DahA                        | (1.9-5.2)/(0.7-2.9)/(0.5-6.9)            | (2.54)/(1.46)/(3.02)          | (4.43)/(2.46)/(2.56)                 |
| BghiP                       | (2.53-17.0)/(1.2-10.7)/(1.4-15.4)        | (5.80)/(4.70)/(8.80)          | (7.86)/(6.47)/(7.62)                 |
| Total                       | (18-297)/(19-167)/(23-165)               | (87.32)/(72.5)/(107.40)       |                                      |
| 10 OPAHs                    | (3 h)/(9 h)/(15 h)                       | (3 h)/(9 h)/(15 h)            | (3 h)/(9 h)/(15 h)                   |
| 1,4-NAQ                     | (0.02-8.1)/(0.16-3.1)/(0.1-4.2)          | (2.25)/(1.27)/(1.66)          | (6.22)/(5.39)/(3.70)                 |
| 1-NALD                      | (0.2-0.8)/(0.07-0.5)/(0.08-0.9)          | (0.43)/(0.20)/(0.49)          | (2.71)/(1.19)/(1.25)                 |
| <b>9-FLON</b>               | <b>(0.49-14.9)/(0.7-6.0)/(0.8-11.4)</b>  | <b>(6.76)/(2.56)/(4.26)</b>   | <b>(25.84)/(14.30)/(10.25)</b>       |
| <b>9,10-ANQ</b>             | <b>(0.3-36.4)/(1.2-46.1)/(2.8-36.04)</b> | <b>(8.31)/(13.33)/(14.28)</b> | <b>(24.31)/(35.83)/(32.74)</b>       |
| <b>1,8-NANY<sup>a</sup></b> | <b>(0.3-16.3)/(1.0-6.9)/(3.7-9.3)</b>    | <b>(7.09)/(3.69)/(6.81)</b>   | <b>(37.86)/(33.25)/(45.64)</b>       |
| PHCA                        | (0.1-0.9)/(0.05-0.6)/(0.06-1.9)          | (0.26)/(0.20)/(0.71)          | (1.42)/(0.99)/(1.50)                 |
| BaFLU                       | (0.06-10.8)/(0.1-8.1)/(0.4-15.1)         | (2.77)/(2.72)/(5.99)          | (7.47)/(9.73)/(12.07)                |
| BANTone                     | (0.08-15.1)/(0.04-8.3)/(0.5-19.8)        | (2.46)/(2.63)/(9.27)          | (6.10)/(9.05)/(19.12)                |
| 1-PYRCA                     | (0.007-1.8)/(0.008-1.5)/(0.05-4.2)       | (0.31)/(0.39)/(1.31)          | (0.74)/(1.24)/(1.96)                 |

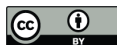

|                     |                                          |                             |                                |
|---------------------|------------------------------------------|-----------------------------|--------------------------------|
| 1,2-BANQ            | (0.02-3.6)/(0.03-2.6)/(0.2-10.3)         | (0.87)/(0.90)/(2.77)        | (2.3)/(3.24)/(4.33)            |
| Total               | (1.8-87.9)/(3.6-55.3)/(8.9-95.5)         | (28.74)/(21.68)/(41.63)     |                                |
| 9 NPAHs             | (3 h)/(9 h)/(15 h)                       | (3 h)/(9 h)/(15 h)          | (3 h)/(9 h)/(15 h)             |
| 1-NNAP              | (0.01-0.1)/(0.008-0.04)/(0.005-0.03)     | (0.03)/(0.01)/(0.01)        | (4.38)/(3.08)/(0.57)           |
| <b>3-NDBF</b>       | <b>(0.08-1.5)/(0.02-0.06)/(0.03-2.4)</b> | <b>(0.33)/(0.03)/(0.89)</b> | <b>(33.39)/(7.92)/(22.39)</b>  |
| 5-NAC <sup>b</sup>  | (0.04-0.1)/(<LOQ)/(0.03-0.35)            | (0.08)/(<LOQ)/(0.18)        | (5.64)/(<LOQ)/(4.67)           |
| 2-NFLU              | (0.03-0.3)/(0.01-0.3)/(0.01-0.5)         | (0.08)/(0.09)/(0.26)        | (10.15)/(10.00)/(7.28)         |
| <b>9-NANT</b>       | <b>(0.01-1.2)/(0.06-0.1)/(0.4-2.4)</b>   | <b>(0.36)/(0.41)/(1.18)</b> | <b>(27.13)/(53.45)/(47.5)</b>  |
| <b>3-NFLT</b>       | <b>(0.05-1.2)/(0.02-0.5)/(0.04-1.2)</b>  | <b>(0.34)/(0.21)/(0.54)</b> | <b>(24.56)/(23.45)/(17.67)</b> |
| 1-NPYR <sup>c</sup> | (0.01-0.1)/(0.01-0.06)/(0.008-0.2)       | (0.05)/(0.06)/(0.02)        | (2.92)/(2.48)/(2.01)           |
| 6-NCHR <sup>d</sup> | (0.05-0.2)/(<LOQ)/(0.009-0.02)           | (0.09)/(<LOQ)/(0.01)        | (5.6)/(<LOQ)/(0.5)             |
| 6-NBaP <sup>e</sup> | (<LOQ)/(<LOQ)/(0.02-0.08)                | (<LOQ)/(<LOQ)/(0.05)        | (<LOQ)/(<LOQ)/(1.26)           |
| Total               | (0.15-3.92)/(0.13-2.0)/(0.57-6.43)       | (1.17)/(0.80)/(3.06)        |                                |

682 <sup>a</sup> Quantified in 28/54 samples683 <sup>b</sup> Quantified in 7/54 samples684 <sup>c</sup> Quantified in 35/54 samples685 <sup>d</sup> Quantified in 5/54 samples686 <sup>e</sup> Quantified in 11/54 samples687 <sup>NA</sup> Not available due to lack of data for 3 h samples.

688

689

690

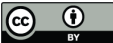

691

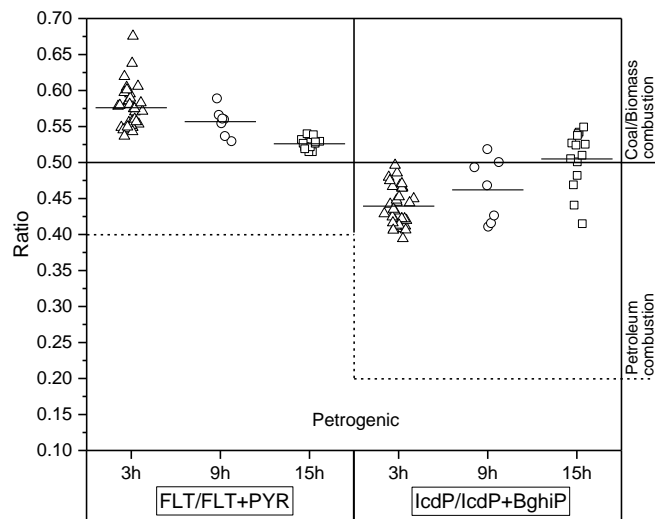

692

693 **Figure 3. Column scatter of FLT/(FLT + PYR) and IcdP/(IcdP + BghiP) in the particulate phase at three different time**  
694 **sampling, open triangles and circles represent the daytime data for 3 h and 9 h samples, respectively, open squares**  
695 **represent the night-time data of 15 h. The dash line separates the petroleum combustion source from petrogenic source**  
696 **for both ratios. The solid short line on each data set represent the mean value of ratios.**

697

698

699 **Table 3. Average Concentration of  $\Sigma\text{BaP}_{\text{eq}}$  in  $\text{ng m}^{-3}$  and cancer risk assessment for the sum of 16PAHs, 10PAH and**  
700 **6NPAHs.**

| Sampling hours                   | $\Sigma[\text{BaP}]_{\text{eq}}$<br>$\text{ng m}^{-3}$ | $\text{UR}_{\text{BaP}} = 1.1 \times 10^{-6}$<br>(CalEPA) | $\text{UR}_{\text{BaP}} = 8.7 \times 10^{-5}$<br>(WHO) | Risk per<br>million people               |
|----------------------------------|--------------------------------------------------------|-----------------------------------------------------------|--------------------------------------------------------|------------------------------------------|
| 9 h (daytime, n=40) <sup>a</sup> | 15.9 <sup>a</sup>                                      | $1.75 \times 10^{-5}$                                     | $1.38 \times 10^{-3}$                                  | 17 <sup>b</sup> – 1383 <sup>c</sup>      |
| 15 h (night-time, n=14)          | 28.28                                                  | $3.17 \times 10^{-5}$                                     | $2.46 \times 10^{-3}$                                  | 31 <sup>b</sup> – 2460 <sup>c</sup>      |
| <b>24h (n=54)</b>                | <b>23.6</b>                                            | <b><math>2.6 \times 10^{-5}</math></b>                    | <b><math>2.05 \times 10^{-3}</math></b>                | <b>26<sup>b</sup> – 2053<sup>c</sup></b> |

701 <sup>a</sup> Average includes combined 3 h samples in each day (n=33) and 9 h samples (n=7)

702 <sup>b</sup> Calculated Value according to CalEPA

703 <sup>c</sup> Calculated Value according to WHO

704 n: number of samples

705



706

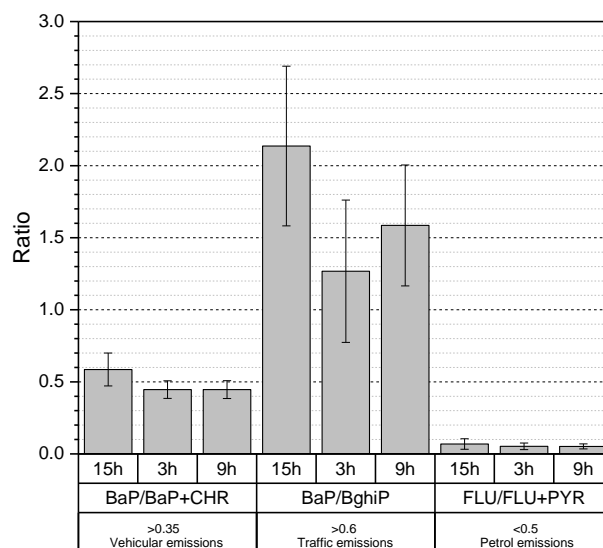

**Figure 4.** Column distribution of BaP/BaP+CHR, BaP/BghiP and FLU/FLU+PYR in the particulate phase at three different time sampling. 3 h and 9 h represent samples collected during the day and 15 h for samples at night. Error bars reflect standard deviations.

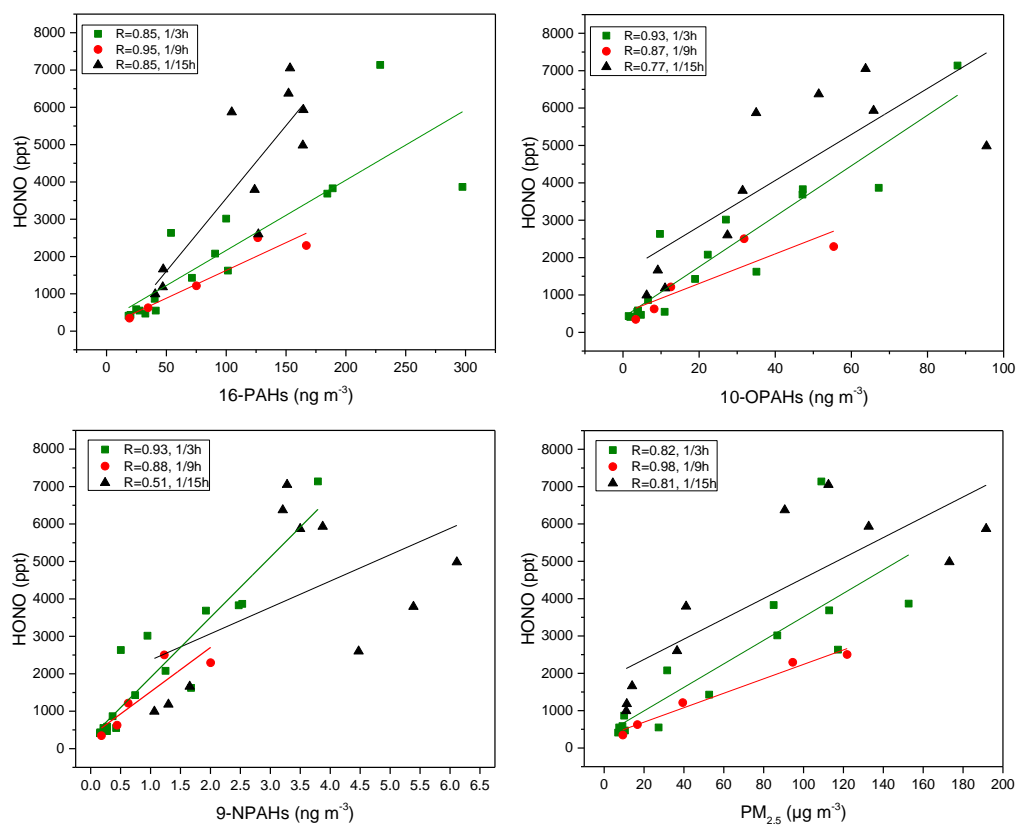

727

728 **Figure 5. Correlation coefficient of  $\Sigma$ PAHs,  $\Sigma$ OPAHs,  $\Sigma$ NPAHs and  $PM_{2.5}$  with HONO. Time sampling resolution 1/3**  
 729 **h and 1/9 h refer to diurnal concentrations and 1/15 h to nocturnal concentrations. Significance levels were between**  
 730 **0.001 and 0.05 except for HONO and NPAHs at night, P level > 0.05 and Pearson coefficient 0.52.**

731



732

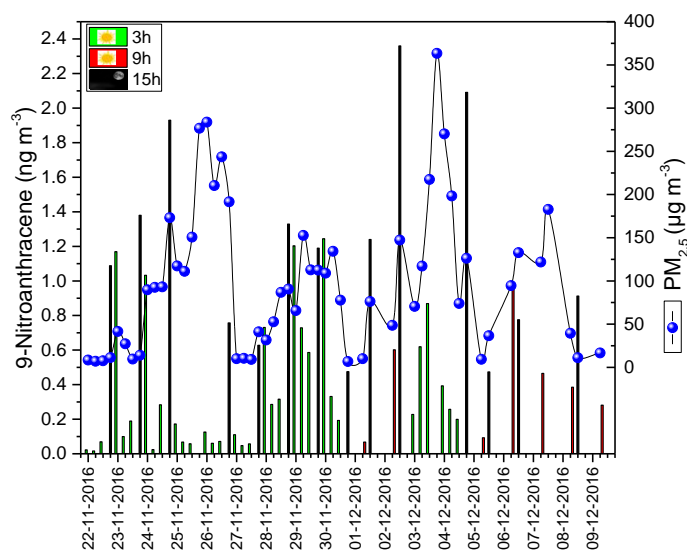

733

734 **Figure 6. Temporal variation of 9-Nitroanthracene and PM<sub>2.5</sub> during the entire winter campaign.**

735
